# Supplementary material for: Genome-Wide Identification and Comparative Analysis for OPT Family Genes in Panax ginseng and Eleven Flowering Plants
Source: MDPI journal article supplement (doi:10.3390/molecules24010015), 2018-12-20
Supplement: s1 [file Supplementary material 2-Table S1-S8.xlsx]

## Sheet: Table S1
Gene_ID	Protein_Length	PSORT_Predictions	pI	GRAVY	MW
BjGT1	661	plas:12,E.R.:2	9.29	0.424	74149.2
DCAR_YSL_1	677	plas:9,E.R.:3,nucl:1,vacu:1	6.22	0.556	74007
DCAR_001529	246	plas:6,vacu:4,chlo:2,cyto:1,E.R.:1	8.98	0.597	27287.6
DCAR_OPT_1	746	plas:13,vacu:1	6.92	0.451	83726.6
DCAR_YSL_2	678	plas:9,vacu:3,golg:2	9.04	0.452	73926.7
DCAR_YSL_3	678	plas:9,E.R.:2,golg:2,vacu:1	9.05	0.443	74061.9
DCAR_YSL_4	686	plas:11,E.R.:2,golg:1	9	0.425	75384.3
DCAR_YSL_5	504	plas:10,vacu:2,E.R.:2	8.43	0.515	55663.9
DCAR_YSL_6	460	plas:9,E.R.:4,chlo:1	8.94	0.612	50594
DCAR_YSL_7	496	plas:7,chlo:2,E.R.:2,golg:2,vacu:1	5.29	0.559	54228.6
DCAR_YSL_8	496	plas:13,E.R.:1	9.14	0.487	54643.4
DCAR_YSL_9	669	plas:9,vacu:2,golg:2,E.R.:1	8.43	0.429	73049.6
DCAR_YSL_10	673	plas:9,vacu:2,golg:2,E.R.:1	8.76	0.392	73758.4
DCAR_YSL_11	694	plas:9,vacu:2,golg:2,E.R.:1	8.94	0.419	76049.1
DCAR_YSL_12	455	plas:9,E.R.:2,nucl:1,cyto:1,vacu:1	8.88	0.19	51011.2
DCAR_YSL_13	714	plas:11,E.R.:2,vacu:1	8.37	0.378	78608.7
DCAR_OPT_2	748	plas:11,nucl:1,vacu:1,E.R.:1	8.72	0.379	83941.2
GSVI_OPT_1	752	plas:13,vacu:1	9.19	0.359	84366
GSVIVT01007217001	344	plas:7,E.R.:3,cyto:2,vacu:1,golg:1	8.39	0.423	38569.2
GSVI_OPT_2	749	plas:10,vacu:2,cyto:1,E.R.:1	8.17	0.535	84495.4
GSVI_OPT_3	700	plas:10,vacu:2,chlo:1,E.R.:1	9.38	0.488	78748.6
GSVI_YSL_1	532	plas:11,chlo:1,vacu:1,golg:1	9.39	0.505	58323.6
GSVI_YSL_2	506	plas:13,chlo:1	9.24	0.43	55616.4
GSVI_YSL_10	518	plas:9,E.R.:3,vacu:2	9.3	0.338	57835.8
GSVI_OPT_4	709	plas:10,cyto:2,E.R.:2	8.72	0.376	78996.3
GSVI_OPT_5	749	plas:9,cyto:2,E.R.:2,vacu:1	8.7	0.45	83844.3
GSVI_OPT_6	624	plas:8,E.R.:3,cyto:2,golg:1	9.34	0.515	70010.4
GSVIVT01014725001	581	plas:11,nucl:1,vacu:1,E.R.:1	9.64	0.422	65082.8
GSVIVT01014726001	211	vacu:6,plas:3,cyto:2,E.R.:2,extr:1	6.3	0.532	23318.4
GSVI_OPT_7	745	plas:11,E.R.:2,vacu:1	8.88	0.45	83885.3
GSVI_OPT_8	689	plas:9.5,golg_plas:6.5,golg:2.5,vacu:1,E.R.:1	6.28	0.519	77513.6
GSVI_YSL_3	679	plas:11,vacu:1,E.R.:1,golg:1	9.08	0.473	75390.4
GSVI_YSL_4	549	plas:10,chlo:1,vacu:1,E.R.:1,golg:1	8.92	0.477	60970.9
GSVI_YSL_5	527	plas:6,golg:4,chlo:1,nucl:1,extr:1,vacu:1	9.32	0.341	58425.4
GSVI_YSL_6	518	plas:8,golg:3,chlo:1,vacu:1,E.R.:1	8.91	0.547	56272.3
GSVI_YSL_7	527	plas:6.5,golg_plas:6,golg:4.5,chlo:1,nucl:1,vacu:1	9.31	0.343	58361.3
GSVI_YSL_8	675	plas:8,vacu:3,E.R.:3	5.7	0.573	73364.9
GSVI_OPT_9	693	plas:7,vacu:4,E.R.:2,cyto:1	9.16	0.515	78036.8
GSVI_OPT_10	690	plas:13,E.R.:1	9.45	0.484	77379.4
GSVI_YSL_9	649	plas:11,E.R.:3	9.14	0.44	71243.9
Mane_OPT_1	734	plas:14	9.19	0.408	82776.4
Mane_YSL_1	667	plas:10,vacu:2,golg:2	9.1	0.481	73267.4
Mane_YSL_2	666	plas:11,golg:2,E.R.:1	9.01	0.462	73434.9
Mane_YSL_3	664	plas:13,vacu:1	8.92	0.504	72861.1
Mane_YSL_4	625	plas:10,E.R.:2,vacu:1,golg:1	9.36	0.513	68412.3
Mane_OPT_2	749	plas:13,vacu:1	6.82	0.415	84262.3
Mane_OPT_3	754	plas:13,vacu:1	9.01	0.349	84571.7
Mane_YSL_5	665	plas:11,E.R.:2,vacu:1	8.05	0.648	72500.4
Mane_YSL_6	687	plas:9,vacu:3,golg:2	8.8	0.5	75423.4
Mane_YSL_7	714	plas:12,E.R.:2	8.55	0.308	79314.5
Mane_YSL_8	664	plas:8,vacu:4,golg:2	9.06	0.448	72744.5
Mane_OPT_4	762	plas:14	8.96	0.351	85314.7
Mane_OPT_5	746	plas:14	9.12	0.376	83897.7
Mane_OPT_6	744	plas:13,vacu:1	8.73	0.433	83364.6
Mane_OPT_7	642	plas:13,vacu:1	9	0.327	72576.4
Mane_OPT_8	587	plas:14	8.95	0.285	66116
Mane_YSL_9	669	plas:10,E.R.:3,vacu:1	6.36	0.569	72885.6
Mane_OPT_9	760	plas:12,vacu:1,E.R.:1	8.96	0.375	85355.1
Mane_OPT_10	552	plas:9,vacu:3,cyto:1,E.R.:1	8.78	0.451	62266
Mane_OPT_11	749	plas:13,vacu:1	8.85	0.483	83852.7
Mane_YSL_10	699	plas:9,golg:3,vacu:2	8.94	0.351	77400.3
Medt_YSL_1	673	plas:10,golg:3,vacu:1	8.6	0.428	74226
Medtr1626s0010.1	235	vacu:5,plas:4,E.R.:2,chlo:1,cyto:1,golg:1	8.53	0.452	26735.3
Medt_YSL_2	673	plas:9,vacu:2,golg:2,E.R.:1	8.47	0.493	73911.8
Medt_YSL_3	680	plas:12,E.R.:2	8.97	0.475	75064.8
Medt_OPT_1	729	plas:13,vacu:1	8.67	0.423	81952.8
Medt_YSL_4	696	plas:7,vacu:3,golg:3,E.R.:1	8.89	0.486	76218.4
Medt_YSL_5	690	plas:8,vacu:3,golg:2,E.R.:1	8.92	0.551	75447.8
Medt_OPT_2	737	plas:13,vacu:1	7.6	0.423	82900.9
Medt_YSL_6	667	plas:9,vacu:2,golg:2,E.R.:1	8.9	0.521	73143.2
Medt_YSL_7	664	plas:9,vacu:2,golg:2,E.R.:1	8.79	0.518	72805.7
Medt_OPT_3	726	plas:13,E.R.:1	8.93	0.432	81795
Medt_OPT_4	718	plas:8,golg:3,E.R.:2,vacu:1	8.86	0.393	80399.9
Medt_OPT_5	741	plas:14	9.25	0.399	83411.2
Medt_OPT_6	546	plas:13,vacu:1	9.29	0.398	61565.5
Medt_YSL_8	682	plas:10,golg:2,vacu:1,E.R.:1	8.96	0.541	74437.7
Medtr5g091615.1	295	plas:9,chlo:1,nucl:1,cyto:1,vacu:1,E.R.:1	9.21	0.203	32929.6
Medt_OPT_7	752	plas:13,vacu:1	8.55	0.456	84063.5
Medt_OPT_8	754	plas:10,cyto:2,E.R.:2	8.95	0.448	84231.8
Medt_OPT_9	746	plas:12,vacu:1,E.R.:1	8.91	0.448	83569
Medt_YSL_9	712	plas:8,vacu:4,E.R.:1,golg:1	8.67	0.356	79020.3
Medt_YSL_10	679	plas:12,vacu:1,E.R.:1	5.88	0.458	74330
Medt_OPT_10	752	plas:9,cyto:2,E.R.:2,vacu:1	8.85	0.427	84040.4
Medt_OPT_11	773	plas:10,cyto:2,E.R.:2	7.96	0.409	86408
Medt_OPT_12	773	plas:13,E.R.:1	8.93	0.434	86273.2
Medt_OPT_13	739	plas:13,vacu:1	8.28	0.468	82596.7
PGSC_OPT_1	731	plas:12,vacu:1,E.R.:1	8.78	0.522	81867.5
PGSC_OPT_2	448	plas:8,vacu:2,E.R.:2,golg:2	9.22	0.465	51284.3
PGSC_OPT_3	741	plas:12,vacu:2	8.38	0.452	83704.1
PGSC_OPT_4	755	plas:13,vacu:1	8.85	0.382	85397.7
PGSC_OPT_5	739	plas:13,vacu:1	8.71	0.495	83046.6
PGSC0003DMP400018861	308	plas:7,E.R.:3,vacu:2,golg:2	9.07	0.519	35213.4
PGSC_YSL_1	655	plas:8,vacu:3,golg:2,E.R.:1	8.63	0.503	71755.3
PGSC_YSL_2	674	plas:11,E.R.:2,vacu:1	8.98	0.446	74547.3
PGSC_OPT_6	749	plas:13,vacu:1	6.34	0.457	84443.6
PGSC0003DMP400023374	247	vacu:9,cyto:1,plas:1,extr:1,E.R.:1,golg:1	7.82	0.379	27281.9
PGSC_OPT_7	752	plas:12,vacu:1,E.R.:1	9.11	0.431	83956.9
PGSC_OPT_8	565	plas:11,chlo:1,vacu:1,E.R.:1	9.16	0.445	63144.3
PGSC0003DMP400024207	369	plas:9,golg:3,vacu:2	7.62	0.478	41007.2
PGSC0003DMP400024209	323	plas:8,vacu:2,chlo:1,extr:1,E.R.:1,golg:1	6.33	0.593	35706.1
PGSC_YSL_3	637	plas:9,vacu:3,golg:2	8.71	0.457	70043.4
PGSC_YSL_4	487	plas:8,E.R.:3,golg:2,chlo:1	8.8	0.494	53798.3
PGSC_YSL_5	692	plas:9,E.R.:3,cyto:1,vacu:1	8.97	0.453	76127.2
PGSC_YSL_6	666	plas:9,vacu:2,golg:2,E.R.:1	9.05	0.513	73381.7
PGSC_OPT_9	709	plas:13,vacu:1	9.27	0.488	80339.6
PGSC_YSL_7	494	plas:7.5,golg_plas:6,golg:3.5,E.R.:2,chlo:1	6.93	0.586	53811.2
PGSC0003DMP400037534	184	vacu:10,plas:2,extr:1,golg:1	7.77	0.87	19996.9
PGSC_OPT_10	754	plas:13,vacu:1	8.28	0.387	84959.3
PGSC_OPT_11	506	plas:11,nucl:1,cyto:1,vacu:1	7.32	0.374	57513
PGSC_YSL_8	699	plas:7,E.R.:5,golg:2	9.05	0.444	76951.2
PGSC_YSL_9	618	plas:10,vacu:3,E.R.:1	8.92	0.464	67725.4
PGSC0003DMP400047301	252	vacu:10,extr:2,plas:1,golg:1	8.85	0.411	27276.8
PGSC_YSL_10	340	vacu:7,plas:5,extr:1,E.R.:1	7	0.525	37431.1
PGSC_YSL_11	599	plas:10,vacu:2,golg:2	8.66	0.51	65281.7
PGSC0003DMP400056395	260	plas:6,vacu:3,golg:3,E.R.:2	5.81	0.483	29276
Potr_YSL_1	661	plas:9,vacu:2,golg:2,E.R.:1	9.15	0.571	72836.2
Potr_YSL_2	669	plas:9,vacu:2,golg:2,E.R.:1	9.11	0.476	73836.2
Potr_YSL_3	668	plas:9,vacu:2,golg:2,E.R.:1	9.11	0.474	73765.2
Potr_YSL_4	669	plas:12,vacu:1,E.R.:1	5.54	0.628	72693.4
Potr_OPT_1	747	plas:14	9.14	0.349	84462.1
Potr_OPT_2	756	plas:14	8.92	0.396	85381.1
Potr_OPT_3	760	plas:13,vacu:1	5.75	0.392	85271
Potr_YSL_5	684	plas:11,cyto:1,vacu:1,E.R.:1	8.99	0.421	75200.8
Potr_YSL_6	704	plas:11,golg:2,E.R.:1	8.69	0.378	77573.9
Potr_YSL_7	698	plas:12,golg:2	8.92	0.409	76426.6
Potr_OPT_4	774	plas:13,E.R.:1	8.54	0.405	86970.5
Potri.006G003666.1.p	227	cyto:8,chlo:2,E.R.:2,mito:1,plas:1	6.12	0.485	25475
Potri.006G003732.1.p	257	plas:11,cyto:1,vacu:1,golg:1	9.54	0.275	29017
Potr_OPT_5	744	plas:13,vacu:1	9.14	0.382	84162.9
Potr_OPT_6	750	plas:13,vacu:1	8.09	0.411	84100.1
Potr_OPT_7	752	plas:14	8.94	0.461	84304.8
Potr_OPT_8	734	plas:13,E.R.:1	9.12	0.41	82894.5
Potr_OPT_9	731	plas:12,vacu:1,E.R.:1	8.81	0.395	82614
Potr_YSL_8	665	plas:10,vacu:2,golg:2	9.05	0.478	72739.8
Potr_OPT_10	748	plas:10,cyto:2,E.R.:2	9.02	0.417	83918.2
Potr_OPT_11	743	plas:12,cyto:1,vacu:1	9.21	0.358	83876.5
Potr_YSL_9	698	plas:10,E.R.:2,nucl:1,vacu:1	8.59	0.371	76780.5
Potri.017G150620.2.p	215	plas:6,chlo:2,nucl:2,vacu:2,cyto:1,E.R.:1	5.7	0.029	24333
Potr_YSL_10	698	plas:11,E.R.:2,vacu:1	8.73	0.343	77014.9
Potr_YSL_11	698	plas:11,nucl:1,vacu:1,E.R.:1	8.91	0.376	76933.9
Potri.017G151500.1.p	330	plas:9,E.R.:2,nucl:1,cyto:1,vacu:1	8.1	0.236	36317.1
Potr_YSL_12	698	plas:11,E.R.:2,vacu:1	8.66	0.353	77076.9
Potr_YSL_13	698	plas:11,nucl:1,vacu:1,E.R.:1	8.8	0.388	76771.8
Sobi_OPT_1	747	plas:14	9.1	0.429	83289.8
Sobi_YSL_1	694	plas:10,vacu:3,E.R.:1	6.7	0.479	74313.5
Sobi_YSL_2	680	plas:13,vacu:1	9.27	0.416	74116.6
Sobi_YSL_3	685	plas:13,vacu:1	8.74	0.481	75688.2
Sobi_YSL_4	684	plas:11,nucl:1,vacu:1,E.R.:1	8.9	0.48	75012.7
Sobi_YSL_5	635	plas:11,golg:2,chlo:1	8.8	0.554	69594.8
Sobi_OPT_2	760	plas:8,vacu:4,golg:2	7.65	0.421	84733.7
Sobi_OPT_3	755	plas:13,vacu:1	8.34	0.399	84415.4
Sobi_YSL_6	678	plas:14	9	0.401	74312.1
Sobi_YSL_7	681	plas:13,E.R.:1	9.16	0.368	74936.9
Sobi_OPT_4	742	plas:11,E.R.:3	8.56	0.389	82542.2
Sobi_YSL_8	722	plas:14	8.7	0.494	78601.9
Sobi_YSL_9	670	plas:10,vacu:2,E.R.:2	7.03	0.542	72636.9
Sobi_YSL_10	720	plas:11,E.R.:2,vacu:1	6.84	0.502	77788.8
Sobi_YSL_11	722	plas:14	8.9	0.478	78381.7
Sobi_YSL_12	627	plas:9,E.R.:2,golg:2,chlo:1	8.8	0.528	68580.6
Sobi_YSL_13	668	plas:8,vacu:2,golg:2,cyto:1,E.R.:1	8.5	0.47	72720.2
Sobi_YSL_14	623	plas:9,vacu:3,golg:2	8.14	0.517	67348.2
Sobi_YSL_15	711	plas:11,E.R.:2,golg:1	9.11	0.449	76952.2
Sobi_OPT_5	736	plas:13,E.R.:1	8.39	0.54	82223.8
Sobi_YSL_16	688	plas:10,E.R.:3,vacu:1	7.92	0.453	74545
Sobi_OPT_6	761	plas:13,E.R.:1	9.21	0.388	84013
Sobi_YSL_17	683	plas:11,E.R.:2,vacu:1	9.01	0.625	74983.6
Sobi_YSL_18	683	plas:11,E.R.:2,vacu:1	8.92	0.623	75034.7
Sobi_YSL_19	683	plas:13,vacu:1	8.9	0.494	75234.3
Sobi_OPT_7	555	plas:11,E.R.:2,vacu:1	6.84	0.484	62563.1
Solyc01g056530.1.1	233	plas:6,E.R.:3,chlo:2,vacu:2,extr:1	9.32	0.456	27144.3
Soly_YSL_1	653	plas:9,vacu:3,golg:2	8.66	0.438	71966.6
Soly_YSL_2	694	plas:9,E.R.:3,cyto:1,vacu:1	8.95	0.447	76159.2
Soly_OPT_1	732	plas:11,vacu:2,E.R.:1	7.91	0.438	82778.9
Soly_YSL_3	674	plas:10,E.R.:2,nucl:1,vacu:1	5.77	0.551	73523.3
Soly_YSL_4	696	plas:10,E.R.:2,cyto:1,vacu:1	9.25	0.428	76767.2
Soly_OPT_2	750	plas:13,vacu:1	8.41	0.419	84405.8
Soly_YSL_5	658	plas:9,golg:3,vacu:2	9.12	0.5	72507.7
Soly_OPT_3	738	plas:14	8.79	0.433	83795.4
Soly_OPT_4	737	plas:9,E.R.:3,nucl:1,vacu:1	8.83	0.515	82711.4
Soly_OPT_5	745	plas:14	8.9	0.463	84060.8
Soly_OPT_6	755	plas:13,vacu:1	8.69	0.353	85374.5
Soly_YSL_6	580	plas:11,E.R.:2,vacu:1	8.21	0.54	64180.7
Soly_OPT_7	749	plas:13,vacu:1	6.25	0.471	84436.7
Soly_YSL_7	663	plas:9,vacu:3,E.R.:1,golg:1	9.13	0.467	73251.8
Soly_YSL_8	606	plas:9,vacu:2,golg:2,E.R.:1	8.77	0.425	66834.4
Soly_OPT_8	755	plas:11,E.R.:2,vacu:1	9.11	0.425	84042.8
Thec_OPT_1	741	plas:11,E.R.:2,vacu:1	8.7	0.43	82993.1
Thec_OPT_2	546	plas:11,E.R.:2,mito:1	9.03	0.436	61365.9
Thec_OPT_3	941	plas:13,vacu:1	8.76	0.416	105234
Thec_YSL_1	694	plas:8,vacu:3,golg:2,E.R.:1	8.95	0.503	76504.7
Thec_OPT_4	732	plas:12,vacu:1,E.R.:1	8.9	0.408	82608.3
Thec_OPT_5	613	plas:12,vacu:1,E.R.:1	8.99	0.441	68704
Thec_YSL_2	668	plas:8,vacu:3,golg:3	9.18	0.475	73459.5
Thec_YSL_3	668	plas:8,vacu:3,golg:3	9.19	0.502	73466.8
Thec_YSL_4	664	plas:11,golg:2,E.R.:1	9.02	0.482	73559.1
Thec_YSL_5	554	plas:11,golg:2,E.R.:1	9.23	0.567	61128.7
Thec_OPT_6	762	plas:13,vacu:1	5.78	0.43	85353.6
Thec_YSL_6	670	plas:12,vacu:1,E.R.:1	6.59	0.545	72909.5
Thec_YSL_7	689	plas:9,vacu:2,golg:2,E.R.:1	9.14	0.376	76212.3
Thec_OPT_7	739	plas:13,E.R.:1	9.02	0.349	82991.3
Thec_OPT_8	680	plas:12,cyto:1,E.R.:1	8.93	0.306	76495.5
Thec_OPT_9	754	plas:9,cyto:2,E.R.:2,vacu:1	8.33	0.39	85073.2
Thec_OPT_10	753	plas:13,vacu:1	9.1	0.372	84906.8
Thec_OPT_11	751	plas:12,E.R.:2	8.63	0.458	84350.1
Thec_OPT_12	752	plas:13,vacu:1	8.18	0.447	84136.4
ARATH_OPT_2	734	plas:12,vacu:1,E.R.:1	8.97	0.496	82334
ARATH_OPT_3	737	plas:13,vacu:1	9.1	0.397	82440.7
ARATH_OPT_7	766	plas:12,vacu:1,E.R.:1	5.7	0.416	86136.4
ORYSJ_YSL_8	694	plas:12,vacu:1,E.R.:1	9.14	0.505	75632.6
ORYSJ_YSL_10	686	plas:8,E.R.:4,golg:2	9.06	0.48	74654.8
ARATH_YSL_3	675	plas:10,E.R.:2,golg:2	8.9	0.443	74149.3
ORYSJ_YSL_12	717	plas:10,golg:2,vacu:1,E.R.:1	8.97	0.512	77691.9
ORYSJ_YSL_4	686	plas:8,vacu:3,golg:2,E.R.:1	8.69	0.634	75100
ORYSJ_YSL_3	683	plas:12,vacu:1,E.R.:1	8.55	0.568	75022.5
ORYSJ_YSL_15	672	plas:12,E.R.:2	9.2	0.412	73149.7
ORYSJ_YSL_2	674	plas:11,E.R.:2,vacu:1	9.03	0.416	73342.9
ORYSJ_YSL_14	727	plas:6,vacu:5,golg:2,cyto:1	8.32	0.466	78493.5
ARATH_YSL_8	724	plas:8,E.R.:5,golg:1	8.82	0.322	80109.3
ARATH_YSL_6	676	plas:11,E.R.:2,vacu:1	5.89	0.603	73573.4
ARATH_YSL_4	670	plas:10,E.R.:2,nucl:1,vacu:1	8.26	0.547	73575
ARATH_YSL_2	664	plas:9,golg:3,vacu:2	9.18	0.412	72982.9
ARATH_YSL_1	673	plas:10,golg:2,cyto:1,E.R.:1	8.87	0.446	74391.7
ORYSJ_YSL_17	698	plas:12,E.R.:2	9.76	0.47	74521
ORYSJ_YSL_7	683	plas:11,E.R.:2,vacu:1	9.21	0.511	74762.2
ORYSJ_YSL_11	712	plas:9,vacu:2,golg:2,E.R.:1	8.52	0.443	77815.9
ORYSJ_YSL_13	724	plas:9,vacu:2,golg:2,E.R.:1	9.1	0.495	78767.3
ORYSJ_YSL_16	675	plas:12,vacu:1,E.R.:1	9.3	0.441	73807.8
ORYSJ_YSL_5	668	plas:12,vacu:1,E.R.:1	6.17	0.58	72727.3
ORYSJ_YSL_6	678	plas:8,vacu:3,E.R.:3	7.48	0.587	73321.9
ORYSJ_YSL_9	684	plas:10,E.R.:4	8.51	0.426	74258
ORYSJ_YSL_18	679	plas:12,E.R.:2	9.35	0.426	73819.1
MAIZE_YS_1	682	plas:10,E.R.:2,golg:2	9.02	0.413	74418.1
ARATH_OPT_1	755	plas:13,vacu:1	8.6	0.361	85348.6
ARATH_OPT_8	733	plas:11,E.R.:2,vacu:1	9.06	0.399	82079.1
ARATH_OPT_9	741	plas:12,E.R.:2	9	0.455	83570.7
ARATH_OPT_4	729	plas:13,vacu:1	8.92	0.428	81792.7
ORYSJ_YSL_1	708	plas:10,vacu:2,E.R.:2	8.48	0.442	75242.4
ARATH_YSL_5	714	plas:9,E.R.:4,vacu:1	8.5	0.348	78852.8
ARATH_YSL_7	688	plas:9,vacu:3,golg:2	9.17	0.473	75701
ARATH_OPT_5	753	plas:14	9.12	0.332	84890.2
ARATH_OPT_6	736	plas:11,vacu:2,E.R.:1	9.03	0.519	82361.1
PG_YSL_1	665	plas:9,vacu:4,golg:1	8.95	0.459	73058.9
PG_YSL_2	677	plas:9,E.R.:3,vacu:2	6.66	0.532	73952.8
PG_YSL_3	664	plas:8,vacu:4,golg:2	8.61	0.483	72922.7
PG_YSL_4	639	vacu:7,plas:4,golg:2,cyto:1	9.19	0.659	69942
PG_YSL_5	422	plas:8,vacu:4,golg:2	7.74	0.114	47057.3
PG_YSL_6	405	plas:10,vacu:2,E.R.:2	9.1	0.455	44052.7
PG_YSL_7	676	plas:11,golg:2,E.R.:1	9.01	0.476	74361.9
PG_OPT_1	606	plas:13,E.R.:1	9.28	0.407	68335.5
PG_YSL_8	671	plas:8,vacu:3,golg:3	8.99	0.424	73673.7
PG_YSL_9	636	plas:11,E.R.:2,vacu:1	7.44	0.558	69396.5
PG_YSL_10	639	plas:8,vacu:3,golg:3	9.04	0.497	70221.9
PG_OPT_2	622	plas:8,vacu:4,cyto:1,E.R.:1	8.93	0.529	69473.6
PG_YSL_11	732	plas:11,vacu:2,E.R.:1	8.57	0.276	81673.5
PG_YSL_12	467	plas:7,vacu:2,E.R.:2,golg:2,nucl:1	8.93	0.134	52876.8
PG_OPT_3	535	plas:6,vacu:4,cyto:1,extr:1,E.R.:1,golg:1	8.24	0.474	60533
PG_OPT_4	757	plas:13,E.R.:1	8.99	0.37	84742.9
PG_YSL_13	703	plas:12,E.R.:2	8.82	0.39	77101
PG_OPT_5	757	plas:13,E.R.:1	8.93	0.37	84757.9
PG_OPT_6	752	plas:13,vacu:1	6.67	0.448	84607.6
PG_OPT_7	748	plas:14	8.74	0.368	84950.2
PG_YSL_14	679	plas:8,E.R.:3,golg:2,vacu:1	9.11	0.638	74163.7
PG_OPT_8	745	plas:13,vacu:1	7.05	0.467	83866.8
PG12085	359	plas:9.5,cyto_plas:5.5,E.R.:2,mito:1,golg:1	9.17	0.445	40440.9
PG_YSL_15	666	plas:11,E.R.:2,vacu:1	7.47	0.535	72623.1
PG_OPT_9	372	plas:5,vacu:3,E.R.:2,golg:2,cyto:1,extr:1	5.86	0.586	41730.1
PG_YSL_16	427	plas:6,vacu:4,E.R.:2,golg:2	7.74	0.141	47637
PG_YSL_17	584	plas:7,golg:4,E.R.:2,vacu:1	9.12	0.335	64697.7
PG07228	429	plas:7,E.R.:5,chlo:1,mito:1	9.36	0.386	46700
PG03376	348	plas:8.5,cyto_plas:5,E.R.:2,mito:1,vacu:1,golg:1	9.27	0.475	39144.5
PG_OPT_10	759	plas:13,vacu:1	5.94	0.454	84853.9
PG_OPT_11	727	plas:13,E.R.:1	8.58	0.467	82074.9
PG_OPT_12	919	plas:14	8.76	0.413	104621
PG_YSL_18	677	plas:10,E.R.:3,nucl:1	8.67	0.471	73906.7
PG_YSL_19	654	plas:9,vacu:3,cyto:1,mito:1	8.83	0.481	72260.9
PG_YSL_20	673	plas:12,vacu:1,E.R.:1	8.81	0.467	73606.8
PG_YSL_21	686	plas:11,E.R.:2,vacu:1	9.06	0.524	75070.6
PG_YSL_22	662	plas:10,vacu:3,E.R.:1	7.1	0.297	73247.2

## Sheet: Table S2
Paralogous pairs		Ka	Ks	Ka/Ks	Duplication time (million years ago，MYA)
PG_OPT_4	PG_OPT_5	0.0058	0.0266	0.2174	1.99102
PG_OPT_6	PG_OPT_8	0.0032	0.0105	0.3062	0.785928
PG_OPT_9	PG_OPT_10	0.005	0	99	NA
PG_OPT_7	PG_OPT_12	0.0055	0.0258	0.2124	1.93114
PG_YSL_1	PG_YSL_3	0.0076	0.0225	0.3387	1.68413
PG_YSL_4	PG_YSL_14	0.014	0.0258	0.5417	1.93114
PG_YSL_5	PG_YSL_16	0.0064	0.0314	0.2046	2.3503
PG_YSL_6	PG_YSL_17	NA	NA	NA	NA
PG_YSL_8	PG_YSL_20	0.0187	0.06	0.3121	4.49102
PG_YSL_11	PG_YSL_12	0.0061	0.0344	0.1761	2.57485
PG_YSL_18	PG_YSL_21	0.024	0.0363	0.6599	2.71707
PG_YSL_19	PG_YSL_22	0.0396	0.0612	0.6465	4.58084
DCAR_YSL_2	DCAR_YSL_3	0.0086	0.0519	0.1665	8.91753
DCAR_YSL_9	DCAR_YSL_10	0.0422	0.1622	0.2604	27.8694
PGSC_OPT_2	PGSC_OPT_3	0.0222	0.0351	0.6319	6.52416
PGSC_OPT_7	PGSC_OPT_8	0.0154	0.0289	0.5339	5.37175
PGSC_OPT_10	PGSC_OPT_11	0.0126	0.0209	0.6037	3.88476
GSVI_OPT_5	GSVI_OPT_6	0.0157	0.0156	1.0019	1.2
GSVI_YSL_1	GSVI_YSL_2	0.0663	0.1575	0.4212	12.1154
GSVI_YSL_3	GSVI_YSL_4	0.055	0.292	0.1883	22.4615
GSVI_YSL_5	GSVI_YSL_7	0.0086	0.0171	0.5038	1.31538
Potr_OPT_1	Potr_OPT_2	0.0237	0.0481	0.4915	2.64286
Potr_OPT_8	Potr_OPT_9	0.0798	0.4136	0.1929	22.7253
Potr_YSL_2	Potr_YSL_3	0	0	0	0
Potr_YSL_10	Potr_YSL_12	0.0078	0.0221	0.3532	1.21429
Mane_OPT_3	Mane_OPT_9	0.0908	0.4291	0.2117	33.0077
Mane_OPT_4	Mane_OPT_8	0.0877	0.3997	0.2195	30.7462
Mane_YSL_2	Mane_YSL_3	0.065	0.3119	0.2083	23.9923
Thec_OPT_1	Thec_OPT_2	0.0101	0.0328	0.3074	2.52308
Thec_OPT_4	Thec_OPT_5	0.0252	0.0542	0.465	4.16923
Thec_OPT_7	Thec_OPT_8	0	0	99	0
Thec_OPT_10	Thec_OPT_11	0.1515	0.7078	0.214	54.4462
Thec_YSL_2	Thec_YSL_3	0.012	0.0124	0.9678	0.953846
Thec_YSL_4	Thec_YSL_5	0	0	99	0
Medt_OPT_5	Medt_OPT_6	0.0078	0.0131	0.5937	0.606481
Medt_YSL_1	Medt_YSL_2	0.0484	0.1812	0.2668	8.38889
Medt_YSL_4	Medt_YSL_5	0.0547	0.1741	0.3142	8.06019
Medt_YSL_6	Medt_YSL_7	0.0054	0.0111	0.486	0.513889
ARATH_OPT_1	ARATH_OPT_5	0.1342	0.9449	0.142	31.4967
ARATH_OPT_6	ARATH_OPT_9	0.3821	2.8247	0.1353	94.1567
ARATH_YSL_4	ARATH_YSL_6	0.0915	0.6553	0.1397	21.8433
ARATH_YSL_5	ARATH_YSL_8	0.0839	0.6969	0.1204	23.23
ORYSJ_YSL_3	ORYSJ_YSL_4	0.1711	0.5792	0.2955	44.5538
Sobi_YSL_13	Sobi_YSL_14	0.0008	0	99	0
Sobi_YSL_17	Sobi_YSL_18	0.0375	0.1885	0.199	14.5

## Sheet: Table S3
Scaffold id	Gene name	OPT name	Start	End	Strand	Gene_length
101321	PG06711_1	PG_OPT_10	7735	11961	+	4226
101321	PG06711_2	PG_OPT_11	13082	16549	+	3467
84758	PG14845	PG_YSL_4	5421	8562	-	3141
84758	PG14846	PG_YSL_5	18	1985	-	1967
153851	PG33308	PG_YSL_14	4148	7954	+	3806
153851	PG33309	PG_YSL_16	12028	14062	+	2034
38808	PG31336_1	PG_YSL_18	10861	24388	-	13527
38808	PG31336_2	PG_YSL_19	6544	9391	-	2847
64492	PG39216_1	PG_YSL_21	64719	68551	-	3832
64492	PG39216_2	PG_YSL_22	57767	62360	-	4593
88488	PG11811	PG_YSL_15	32588	46706	+	14118
88488	PG11812	PG_YSL_9	7330	24089	+	16759
9735	PG25519	PG_YSL_8	2604	6107	+	3503
9735	PG25520	PG_YSL_10	2894	9352	+	6458

## Sheet: Table S4
Motifs	No. of genes in PT clade	No. of genes in YSL clade
Motif_1	56	0
Motif_2	3	138
Motif_3	8	0
Motif_4	1	10
Motif_5	3	33
Motif_6	49	0
Motif_7	0	3
Motif_8	0	133
Motif_9	25	107
Motif_10	101	1
Motif_11	16	58
Motif_12	0	6
Motif_13	55	0
Motif_14	101	0
Motif_15	1	138
Motif_16	0	138
Motif_17	0	9
Motif_18	1	139
Motif_19	93	0
Motif_20	1	86
Motif_21	0	122
Motif_22	0	127
Motif_23	98	0
Motif_24	0	10
Motif_25	47	0
Motif_26	0	146
Motif_27	102	2
Motif_28	1	141
Motif_29	106	0
Motif_30	0	15
note: there are 107 members in PT clade and 150 members in YSL clade respectively

## Sheet: Table S5
	GRF	PG_YSL_15	PG_YSL_11	PG_YSL_7	TTF-type(Zn)	PG_YSL_5	PG_YSL_13	PG_OPT_7	PG_YSL_2	PG_OPT_4	PG_OPT_10	PG_OPT_11	PG_YSL_3	PG_OPT_8	ARID	PG_YSL_12	PG_YSL_8	PG_YSL_16	PG_OPT_5	PG_OPT_3	PG_OPT_6	PLATZ	A20-like	ABTB	AP2-EREBP	ARF	AS2-LOB	AUX-IAA	B3-Domain	BED-type(Zn)	BES/BZR	bHLH	Bromodomain	BTB-POZ	BTB-POZ-MATH	bZIP	C2C2-CO-like	C2C2-Dof	C2C2-GATA	C2H2	C3H	C3H-WRC/GRF	CCHC(Zn)	CG1-CAMTA	CHROMO-DOMAIN	CW-Zn	CW-Zn-B3/VAL	DDT	E2F-DP
GRF	1	0.75	0.166667	-0.116667	0.166667	0.85	0.333333	0.0833333	0.5	0.533333	0.716667	0.2	-0.733333	0.166667	-0.55	0.866667	-0.3	0.816667	0.733333	-0.183333	0.55	0.4	0.9	0.483333	0.816667	0.933333	0.533333	0.733333	0.516667	0.583333	0.9	0.85	0.8	0.716667	0.683333	0.733333	0.783333	0.366667	0.866667	0.75	0.666667	0.0333333	0.533333	0.6	0.4	0.383333	0.5	0.733333	0.533333
PG_YSL_15	0.75	1	-0.233333	-0.166667	0.4	0.733333	0.2	-0.4	0.85	0.666667	0.9	0.266667	-0.216667	0.35	-0.0833333	0.666667	0.266667	0.6	0.883333	0.216667	0.8	0.733333	0.816667	0.7	0.733333	0.783333	0.766667	0.516667	0.683333	0.8	0.683333	0.883333	0.783333	0.716667	0.833333	0.85	0.866667	0.616667	0.8	0.766667	0.8	0.5	0.716667	0.766667	0.733333	0.666667	0.766667	0.683333	0.733333
PG_YSL_11	0.166667	-0.233333	1	-0.466667	-0.766667	0.116667	-0.25	0.683333	-0.35	-0.166667	-0.316667	0.133333	-0.45	-0.233333	-0.25	0.4	-0.916667	-0.05	-0.383333	-0.516667	-0.566667	-0.45	-0.15	-0.316667	-0.283333	0.183333	-0.133333	0	-0.183333	-0.433333	0.283333	-0.233333	-0.416667	-0.366667	-0.55	-0.516667	-0.366667	-0.583333	-0.0666667	-0.45	-0.516667	-0.466667	-0.616667	-0.6	-0.45	-0.5	-0.583333	-0.366667	-0.55
PG_YSL_7	-0.116667	-0.166667	-0.466667	1	0.0166667	0.183333	0.433333	0.25	-0.283333	-0.316667	-0.1	-0.85	0.166667	-0.4	-0.166667	-0.3	0.416667	0.35	0.0833333	-0.133333	0.0333333	-0.333333	0.133333	-0.183333	0.2	-0.3	-0.366667	-0.316667	-0.333333	-0.05	-0.116667	0.133333	0.15	-0.133333	0.0166667	0.05	0.166667	0.55	0.133333	0.116667	0.0166667	-0.333333	-0.05	0	-0.333333	-0.333333	-0.0666667	0.0166667	-0.0333333
TTF-type(Zn)	0.166667	0.4	-0.766667	0.0166667	1	0	0.133333	-0.8	0.566667	0.566667	0.466667	0.25	0.2	0.633333	0.283333	0.0333333	0.6	0.1	0.55	0.733333	0.766667	0.75	0.333333	0.633333	0.516667	0.2	0.5	0.433333	0.533333	0.633333	0	0.416667	0.616667	0.616667	0.733333	0.683333	0.533333	0.3	0.0833333	0.666667	0.666667	0.5	0.9	0.816667	0.75	0.833333	0.766667	0.633333	0.833333
PG_YSL_5	0.85	0.733333	0.116667	0.183333	0	1	0.266667	0.166667	0.516667	0.45	0.7	-0.216667	-0.483333	0.05	-0.383333	0.766667	-0.1	0.883333	0.783333	-0.166667	0.533333	0.316667	0.883333	0.533333	0.8	0.716667	0.516667	0.416667	0.433333	0.516667	0.866667	0.9	0.716667	0.466667	0.533333	0.583333	0.833333	0.583333	0.85	0.666667	0.55	0.0166667	0.383333	0.45	0.316667	0.233333	0.45	0.583333	0.483333
PG_YSL_13	0.333333	0.2	-0.25	0.433333	0.133333	0.266667	1	0.3	-0.0666667	-0.35	0.2	-0.133333	-0.233333	-0.6	-0.35	0.1	0.0333333	0.583333	0.25	-0.15	0.0333333	-0.233333	0.266667	-0.2	0.183333	0.2	-0.316667	0.1	-0.416667	0.116667	0.05	0.333333	0.416667	0.366667	0.366667	0.35	0.3	0.6	0.466667	0.433333	0.15	-0.15	0.166667	0.266667	-0.233333	-0.133333	-0.0166667	0.2	0.116667
PG_OPT_7	0.0833333	-0.4	0.683333	0.25	-0.8	0.166667	0.3	1	-0.7	-0.55	-0.433333	-0.433333	-0.366667	-0.75	-0.433333	0.15	-0.7	0.2	-0.4	-0.733333	-0.7	-0.833333	-0.15	-0.633333	-0.25	-0.0166667	-0.55	-0.3	-0.6	-0.483333	0.15	-0.216667	-0.333333	-0.466667	-0.566667	-0.5	-0.333333	-0.183333	0.05	-0.4	-0.566667	-0.816667	-0.716667	-0.666667	-0.833333	-0.866667	-0.766667	-0.383333	-0.666667
PG_YSL_2	0.5	0.85	-0.35	-0.283333	0.566667	0.516667	-0.0666667	-0.7	1	0.683333	0.866667	0.383333	-0.0666667	0.583333	0.116667	0.4	0.4	0.416667	0.833333	0.466667	0.85	0.9	0.65	0.883333	0.616667	0.483333	0.783333	0.533333	0.716667	0.666667	0.433333	0.75	0.7	0.716667	0.783333	0.733333	0.783333	0.516667	0.533333	0.75	0.766667	0.816667	0.783333	0.8	0.9	0.883333	0.9	0.633333	0.833333
PG_OPT_4	0.533333	0.666667	-0.166667	-0.316667	0.566667	0.45	-0.35	-0.55	0.683333	1	0.65	0.216667	-0.05	0.833333	0.2	0.6	0.183333	0.183333	0.7	0.416667	0.766667	0.866667	0.583333	0.85	0.733333	0.65	0.966667	0.466667	0.983333	0.833333	0.65	0.616667	0.6	0.45	0.583333	0.633333	0.666667	0.05	0.316667	0.55	0.716667	0.3	0.75	0.616667	0.866667	0.766667	0.75	0.733333	0.783333
PG_OPT_10	0.716667	0.9	-0.316667	-0.1	0.466667	0.7	0.2	-0.433333	0.866667	0.65	1	0.216667	-0.3	0.316667	-0.183333	0.483333	0.266667	0.666667	0.95	0.1	0.766667	0.783333	0.783333	0.8	0.766667	0.65	0.716667	0.5	0.666667	0.816667	0.683333	0.866667	0.883333	0.783333	0.833333	0.85	0.9	0.65	0.8	0.866667	0.9	0.583333	0.783333	0.783333	0.783333	0.733333	0.866667	0.85	0.833333
PG_OPT_11	0.2	0.266667	0.133333	-0.85	0.25	-0.216667	-0.133333	-0.433333	0.383333	0.216667	0.216667	1	-0.3	0.366667	-0.0666667	0.183333	-0.216667	-0.183333	0.0166667	0.183333	0.166667	0.4	0.0333333	0.15	-0.0833333	0.333333	0.233333	0.583333	0.266667	0.0833333	0	-0.0166667	0.0833333	0.5	0.316667	0.25	-0.0333333	-0.283333	0.05	0.15	0.216667	0.533333	0.283333	0.333333	0.4	0.5	0.266667	0.133333	0.166667
PG_YSL_3	-0.733333	-0.216667	-0.45	0.166667	0.2	-0.483333	-0.233333	-0.366667	-0.0666667	-0.05	-0.3	-0.3	1	0.116667	0.9	-0.5	0.666667	-0.616667	-0.216667	0.6	-0.05	0.05	-0.55	-0.0166667	-0.4	-0.583333	0.0166667	-0.7	-0.0833333	0	-0.6	-0.366667	-0.416667	-0.533333	-0.283333	-0.316667	-0.283333	-0.0166667	-0.616667	-0.383333	-0.3	0.116667	-0.0833333	-0.216667	0.05	-0.0166667	-0.1	-0.4	-0.0333333
PG_OPT_8	0.166667	0.35	-0.233333	-0.4	0.633333	0.05	-0.6	-0.75	0.583333	0.833333	0.316667	0.366667	0.116667	1	0.35	0.283333	0.266667	-0.166667	0.366667	0.65	0.683333	0.8	0.3	0.716667	0.45	0.3	0.766667	0.483333	0.85	0.483333	0.216667	0.283333	0.3	0.333333	0.416667	0.4	0.35	-0.2	-0.0833333	0.316667	0.483333	0.433333	0.633333	0.533333	0.8	0.783333	0.65	0.433333	0.616667
ARID	-0.55	-0.0833333	-0.25	-0.166667	0.283333	-0.383333	-0.35	-0.433333	0.116667	0.2	-0.183333	-0.0666667	0.9	0.35	1	-0.216667	0.466667	-0.6	-0.1	0.75	0.05	0.25	-0.466667	0.216667	-0.3	-0.366667	0.283333	-0.5	0.133333	0.116667	-0.416667	-0.25	-0.333333	-0.433333	-0.216667	-0.266667	-0.183333	-0.183333	-0.616667	-0.283333	-0.25	0.183333	0.05	-0.133333	0.25	0.183333	0	-0.283333	0.133333
PG_YSL_12	0.866667	0.666667	0.4	-0.3	0.0333333	0.766667	0.1	0.15	0.4	0.6	0.483333	0.183333	-0.5	0.283333	-0.216667	1	-0.4	0.55	0.55	0	0.433333	0.333333	0.716667	0.433333	0.65	0.916667	0.633333	0.566667	0.55	0.5	0.85	0.7	0.516667	0.4	0.433333	0.483333	0.6	0.0833333	0.6	0.466667	0.383333	-0.133333	0.35	0.366667	0.333333	0.266667	0.283333	0.466667	0.383333
PG_YSL_8	-0.3	0.266667	-0.916667	0.416667	0.6	-0.1	0.0333333	-0.7	0.4	0.183333	0.266667	-0.216667	0.666667	0.266667	0.466667	-0.4	1	-0.0833333	0.333333	0.583333	0.533333	0.45	0.0666667	0.333333	0.166667	-0.266667	0.216667	-0.2	0.216667	0.383333	-0.316667	0.183333	0.233333	0.15	0.4	0.366667	0.3	0.566667	-0.0166667	0.266667	0.383333	0.516667	0.466667	0.45	0.45	0.433333	0.516667	0.166667	0.45
PG_YSL_16	0.816667	0.6	-0.05	0.35	0.1	0.883333	0.583333	0.2	0.416667	0.183333	0.666667	-0.183333	-0.616667	-0.166667	-0.6	0.55	-0.0833333	1	0.733333	-0.25	0.466667	0.183333	0.85	0.383333	0.75	0.583333	0.216667	0.5	0.166667	0.383333	0.683333	0.85	0.8	0.633333	0.616667	0.633333	0.8	0.716667	0.883333	0.783333	0.566667	0.05	0.416667	0.533333	0.183333	0.2	0.433333	0.616667	0.466667
PG_OPT_5	0.733333	0.883333	-0.383333	0.0833333	0.55	0.783333	0.25	-0.4	0.833333	0.7	0.95	0.0166667	-0.216667	0.366667	-0.1	0.55	0.333333	0.733333	1	0.233333	0.85	0.766667	0.85	0.85	0.883333	0.65	0.75	0.483333	0.683333	0.85	0.7	0.95	0.933333	0.733333	0.85	0.866667	0.983333	0.7	0.766667	0.916667	0.883333	0.45	0.833333	0.816667	0.766667	0.716667	0.866667	0.866667	0.9
PG_OPT_3	-0.183333	0.216667	-0.516667	-0.133333	0.733333	-0.166667	-0.15	-0.733333	0.466667	0.416667	0.1	0.183333	0.6	0.65	0.75	0	0.583333	-0.25	0.233333	1	0.55	0.566667	0	0.5	0.133333	-0.0666667	0.45	0.116667	0.366667	0.3	-0.283333	0.15	0.133333	0.15	0.333333	0.233333	0.216667	0.0666667	-0.316667	0.233333	0.166667	0.45	0.533333	0.45	0.566667	0.616667	0.433333	0.0833333	0.533333
PG_OPT_6	0.55	0.8	-0.566667	0.0333333	0.766667	0.533333	0.0333333	-0.7	0.85	0.766667	0.766667	0.166667	-0.05	0.683333	0.05	0.433333	0.533333	0.466667	0.85	0.55	1	0.866667	0.783333	0.833333	0.833333	0.55	0.766667	0.616667	0.783333	0.766667	0.45	0.816667	0.816667	0.75	0.9	0.883333	0.866667	0.55	0.533333	0.833333	0.866667	0.566667	0.916667	0.933333	0.866667	0.866667	0.933333	0.75	0.9
PLATZ	0.4	0.733333	-0.45	-0.333333	0.75	0.316667	-0.233333	-0.833333	0.9	0.866667	0.783333	0.4	0.05	0.8	0.25	0.333333	0.45	0.183333	0.766667	0.566667	0.866667	1	0.533333	0.916667	0.633333	0.466667	0.883333	0.5	0.883333	0.8	0.4	0.616667	0.666667	0.65	0.75	0.733333	0.7	0.283333	0.333333	0.683333	0.816667	0.716667	0.883333	0.8	1	0.966667	0.933333	0.733333	0.9
A20-like	0.9	0.816667	-0.15	0.133333	0.333333	0.883333	0.266667	-0.15	0.65	0.583333	0.783333	0.0333333	-0.55	0.3	-0.466667	0.716667	0.0666667	0.85	0.85	0	0.783333	0.533333	1	0.616667	0.933333	0.8	0.583333	0.716667	0.6	0.633333	0.8	0.95	0.883333	0.766667	0.816667	0.85	0.916667	0.6	0.883333	0.85	0.8	0.216667	0.666667	0.766667	0.533333	0.516667	0.7	0.766667	0.666667
ABTB	0.483333	0.7	-0.316667	-0.183333	0.633333	0.533333	-0.2	-0.633333	0.883333	0.85	0.8	0.15	-0.0166667	0.716667	0.216667	0.433333	0.333333	0.383333	0.85	0.5	0.833333	0.916667	0.616667	1	0.733333	0.45	0.883333	0.45	0.833333	0.75	0.533333	0.733333	0.716667	0.566667	0.666667	0.65	0.8	0.35	0.383333	0.733333	0.75	0.583333	0.816667	0.716667	0.916667	0.866667	0.883333	0.75	0.916667
AP2-EREBP	0.816667	0.733333	-0.283333	0.2	0.516667	0.8	0.183333	-0.25	0.616667	0.733333	0.766667	-0.0833333	-0.4	0.45	-0.3	0.65	0.166667	0.75	0.883333	0.133333	0.833333	0.633333	0.933333	0.733333	1	0.733333	0.683333	0.633333	0.716667	0.766667	0.783333	0.916667	0.916667	0.7	0.8	0.85	0.933333	0.516667	0.733333	0.866667	0.85	0.15	0.783333	0.783333	0.633333	0.6	0.766667	0.883333	0.8
ARF	0.933333	0.783333	0.183333	-0.3	0.2	0.716667	0.2	-0.0166667	0.483333	0.65	0.65	0.333333	-0.583333	0.3	-0.366667	0.916667	-0.266667	0.583333	0.65	-0.0666667	0.55	0.466667	0.8	0.45	0.733333	1	0.65	0.683333	0.633333	0.666667	0.866667	0.75	0.683333	0.633333	0.65	0.716667	0.683333	0.2	0.75	0.616667	0.633333	0.0166667	0.533333	0.566667	0.466667	0.416667	0.466667	0.666667	0.5
AS2-LOB	0.533333	0.766667	-0.133333	-0.366667	0.5	0.516667	-0.316667	-0.55	0.783333	0.966667	0.716667	0.233333	0.0166667	0.766667	0.283333	0.633333	0.216667	0.216667	0.75	0.45	0.766667	0.883333	0.583333	0.883333	0.683333	0.65	1	0.4	0.95	0.833333	0.65	0.666667	0.583333	0.433333	0.583333	0.616667	0.7	0.15	0.366667	0.55	0.683333	0.4	0.716667	0.6	0.883333	0.766667	0.75	0.666667	0.783333
AUX-IAA	0.733333	0.516667	0	-0.316667	0.433333	0.416667	0.1	-0.3	0.533333	0.466667	0.5	0.583333	-0.7	0.483333	-0.5	0.566667	-0.2	0.5	0.483333	0.116667	0.616667	0.5	0.716667	0.45	0.633333	0.683333	0.4	1	0.5	0.316667	0.483333	0.583333	0.65	0.85	0.716667	0.683333	0.55	0.116667	0.533333	0.683333	0.616667	0.333333	0.616667	0.733333	0.5	0.616667	0.583333	0.6	0.516667
B3-Domain	0.516667	0.683333	-0.183333	-0.333333	0.533333	0.433333	-0.416667	-0.6	0.716667	0.983333	0.666667	0.266667	-0.0833333	0.85	0.133333	0.55	0.216667	0.166667	0.683333	0.366667	0.783333	0.883333	0.6	0.833333	0.716667	0.633333	0.95	0.5	1	0.8	0.633333	0.6	0.583333	0.483333	0.6	0.65	0.65	0.0666667	0.35	0.533333	0.75	0.383333	0.733333	0.633333	0.883333	0.783333	0.783333	0.716667	0.75
BED-type(Zn)	0.583333	0.8	-0.433333	-0.05	0.633333	0.516667	0.116667	-0.483333	0.666667	0.833333	0.816667	0.0833333	0	0.483333	0.116667	0.5	0.383333	0.383333	0.85	0.3	0.766667	0.8	0.633333	0.75	0.766667	0.666667	0.833333	0.316667	0.8	1	0.633333	0.733333	0.783333	0.566667	0.75	0.816667	0.8	0.433333	0.55	0.716667	0.85	0.3	0.833333	0.716667	0.8	0.7	0.783333	0.85	0.85
BES/BZR	0.9	0.683333	0.283333	-0.116667	0	0.866667	0.05	0.15	0.433333	0.65	0.683333	0	-0.6	0.216667	-0.416667	0.85	-0.316667	0.683333	0.7	-0.283333	0.45	0.4	0.8	0.533333	0.783333	0.866667	0.65	0.483333	0.633333	0.633333	1	0.766667	0.666667	0.45	0.466667	0.566667	0.716667	0.233333	0.766667	0.566667	0.6	-0.0833333	0.4	0.383333	0.4	0.283333	0.433333	0.7	0.466667
bHLH	0.85	0.883333	-0.233333	0.133333	0.416667	0.9	0.333333	-0.216667	0.75	0.616667	0.866667	-0.0166667	-0.366667	0.283333	-0.25	0.7	0.183333	0.85	0.95	0.15	0.816667	0.616667	0.95	0.733333	0.916667	0.75	0.666667	0.583333	0.6	0.733333	0.766667	1	0.916667	0.733333	0.833333	0.85	0.983333	0.7	0.85	0.9	0.8	0.3	0.733333	0.783333	0.616667	0.583333	0.75	0.783333	0.783333
Bromodomain	0.8	0.783333	-0.416667	0.15	0.616667	0.716667	0.416667	-0.333333	0.7	0.6	0.883333	0.0833333	-0.416667	0.3	-0.333333	0.516667	0.233333	0.8	0.933333	0.133333	0.816667	0.666667	0.883333	0.716667	0.916667	0.683333	0.583333	0.65	0.583333	0.783333	0.666667	0.916667	1	0.866667	0.916667	0.933333	0.95	0.666667	0.8	0.983333	0.916667	0.35	0.866667	0.883333	0.666667	0.683333	0.833333	0.933333	0.866667
BTB-POZ	0.716667	0.716667	-0.366667	-0.133333	0.616667	0.466667	0.366667	-0.466667	0.716667	0.45	0.783333	0.5	-0.533333	0.333333	-0.433333	0.4	0.15	0.633333	0.733333	0.15	0.75	0.65	0.766667	0.566667	0.7	0.633333	0.433333	0.85	0.483333	0.566667	0.45	0.733333	0.866667	1	0.933333	0.9	0.75	0.516667	0.716667	0.9	0.85	0.566667	0.816667	0.916667	0.65	0.75	0.8	0.783333	0.733333
BTB-POZ-MATH	0.683333	0.833333	-0.55	0.0166667	0.733333	0.533333	0.366667	-0.566667	0.783333	0.583333	0.833333	0.316667	-0.283333	0.416667	-0.216667	0.433333	0.4	0.616667	0.85	0.333333	0.9	0.75	0.816667	0.666667	0.8	0.65	0.583333	0.716667	0.6	0.75	0.466667	0.833333	0.916667	0.933333	1	0.983333	0.866667	0.65	0.716667	0.933333	0.916667	0.55	0.916667	0.983333	0.75	0.8	0.883333	0.816667	0.85
bZIP	0.733333	0.85	-0.516667	0.05	0.683333	0.583333	0.35	-0.5	0.733333	0.633333	0.85	0.25	-0.316667	0.4	-0.266667	0.483333	0.366667	0.633333	0.866667	0.233333	0.883333	0.733333	0.85	0.65	0.85	0.716667	0.616667	0.683333	0.65	0.816667	0.566667	0.85	0.933333	0.9	0.983333	1	0.883333	0.633333	0.766667	0.916667	0.95	0.45	0.9	0.95	0.733333	0.75	0.866667	0.866667	0.833333
C2C2-CO-like	0.783333	0.866667	-0.366667	0.166667	0.533333	0.833333	0.3	-0.333333	0.783333	0.666667	0.9	-0.0333333	-0.283333	0.35	-0.183333	0.6	0.3	0.8	0.983333	0.216667	0.866667	0.7	0.916667	0.8	0.933333	0.683333	0.7	0.55	0.65	0.8	0.716667	0.983333	0.95	0.75	0.866667	0.883333	1	0.716667	0.8	0.933333	0.866667	0.366667	0.816667	0.833333	0.7	0.666667	0.833333	0.85	0.866667
C2C2-Dof	0.366667	0.616667	-0.583333	0.55	0.3	0.583333	0.6	-0.183333	0.516667	0.05	0.65	-0.283333	-0.0166667	-0.2	-0.183333	0.0833333	0.566667	0.716667	0.7	0.0666667	0.55	0.283333	0.6	0.35	0.516667	0.2	0.15	0.116667	0.0666667	0.433333	0.233333	0.7	0.666667	0.516667	0.65	0.633333	0.716667	1	0.7	0.683333	0.566667	0.383333	0.466667	0.583333	0.283333	0.283333	0.533333	0.433333	0.5
C2C2-GATA	0.866667	0.8	-0.0666667	0.133333	0.0833333	0.85	0.466667	0.05	0.533333	0.316667	0.8	0.05	-0.616667	-0.0833333	-0.616667	0.6	-0.0166667	0.883333	0.766667	-0.316667	0.533333	0.333333	0.883333	0.383333	0.733333	0.75	0.366667	0.533333	0.35	0.55	0.766667	0.85	0.8	0.716667	0.716667	0.766667	0.8	0.7	1	0.75	0.716667	0.2	0.466667	0.6	0.333333	0.3	0.533333	0.666667	0.466667
C2H2	0.75	0.766667	-0.45	0.116667	0.666667	0.666667	0.433333	-0.4	0.75	0.55	0.866667	0.15	-0.383333	0.316667	-0.283333	0.466667	0.266667	0.783333	0.916667	0.233333	0.833333	0.683333	0.85	0.733333	0.866667	0.616667	0.55	0.683333	0.533333	0.716667	0.566667	0.9	0.983333	0.9	0.933333	0.916667	0.933333	0.683333	0.75	1	0.883333	0.45	0.883333	0.916667	0.683333	0.733333	0.85	0.883333	0.883333
C3H	0.666667	0.8	-0.516667	0.0166667	0.666667	0.55	0.15	-0.566667	0.766667	0.716667	0.9	0.216667	-0.3	0.483333	-0.25	0.383333	0.383333	0.566667	0.883333	0.166667	0.866667	0.816667	0.8	0.75	0.85	0.633333	0.683333	0.616667	0.75	0.85	0.6	0.8	0.916667	0.85	0.916667	0.95	0.866667	0.566667	0.716667	0.883333	1	0.516667	0.9	0.9	0.816667	0.8	0.933333	0.933333	0.866667
C3H-WRC/GRF	0.0333333	0.5	-0.466667	-0.333333	0.5	0.0166667	-0.15	-0.816667	0.816667	0.3	0.583333	0.533333	0.116667	0.433333	0.183333	-0.133333	0.516667	0.05	0.45	0.45	0.566667	0.716667	0.216667	0.583333	0.15	0.0166667	0.4	0.333333	0.383333	0.3	-0.0833333	0.3	0.35	0.566667	0.55	0.45	0.366667	0.383333	0.2	0.45	0.516667	1	0.55	0.6	0.716667	0.766667	0.716667	0.3	0.55
CCHC(Zn)	0.533333	0.716667	-0.616667	-0.05	0.9	0.383333	0.166667	-0.716667	0.783333	0.75	0.783333	0.283333	-0.0833333	0.633333	0.05	0.35	0.466667	0.416667	0.833333	0.533333	0.916667	0.883333	0.666667	0.816667	0.783333	0.533333	0.716667	0.616667	0.733333	0.833333	0.4	0.733333	0.866667	0.816667	0.916667	0.9	0.816667	0.466667	0.466667	0.883333	0.9	0.55	1	0.95	0.883333	0.916667	0.933333	0.866667	0.966667
CG1-CAMTA	0.6	0.766667	-0.6	0	0.816667	0.45	0.266667	-0.666667	0.8	0.616667	0.783333	0.333333	-0.216667	0.533333	-0.133333	0.366667	0.45	0.533333	0.816667	0.45	0.933333	0.8	0.766667	0.716667	0.783333	0.566667	0.6	0.733333	0.633333	0.716667	0.383333	0.783333	0.883333	0.916667	0.983333	0.95	0.833333	0.583333	0.6	0.916667	0.9	0.6	0.95	1	0.8	0.866667	0.916667	0.8	0.883333
CHROMO-DOMAIN	0.4	0.733333	-0.45	-0.333333	0.75	0.316667	-0.233333	-0.833333	0.9	0.866667	0.783333	0.4	0.05	0.8	0.25	0.333333	0.45	0.183333	0.766667	0.566667	0.866667	1	0.533333	0.916667	0.633333	0.466667	0.883333	0.5	0.883333	0.8	0.4	0.616667	0.666667	0.65	0.75	0.733333	0.7	0.283333	0.333333	0.683333	0.816667	0.716667	0.883333	0.8	1	0.966667	0.933333	0.733333	0.9
CW-Zn	0.383333	0.666667	-0.5	-0.333333	0.833333	0.233333	-0.133333	-0.866667	0.883333	0.766667	0.733333	0.5	-0.0166667	0.783333	0.183333	0.266667	0.433333	0.2	0.716667	0.616667	0.866667	0.966667	0.516667	0.866667	0.6	0.416667	0.766667	0.616667	0.783333	0.7	0.283333	0.583333	0.683333	0.75	0.8	0.75	0.666667	0.283333	0.3	0.733333	0.8	0.766667	0.916667	0.866667	0.966667	1	0.933333	0.716667	0.9
CW-Zn-B3/VAL	0.5	0.766667	-0.583333	-0.0666667	0.766667	0.45	-0.0166667	-0.766667	0.9	0.75	0.866667	0.266667	-0.1	0.65	0	0.283333	0.516667	0.433333	0.866667	0.433333	0.933333	0.933333	0.7	0.883333	0.766667	0.466667	0.75	0.583333	0.783333	0.783333	0.433333	0.75	0.833333	0.8	0.883333	0.866667	0.833333	0.533333	0.533333	0.85	0.933333	0.716667	0.933333	0.916667	0.933333	0.933333	1	0.833333	0.933333
DDT	0.733333	0.683333	-0.366667	0.0166667	0.633333	0.583333	0.2	-0.383333	0.633333	0.733333	0.85	0.133333	-0.4	0.433333	-0.283333	0.466667	0.166667	0.616667	0.866667	0.0833333	0.75	0.733333	0.766667	0.75	0.883333	0.666667	0.666667	0.6	0.716667	0.85	0.7	0.783333	0.933333	0.783333	0.816667	0.866667	0.85	0.433333	0.666667	0.883333	0.933333	0.3	0.866667	0.8	0.733333	0.716667	0.833333	1	0.866667
E2F-DP	0.533333	0.733333	-0.55	-0.0333333	0.833333	0.483333	0.116667	-0.666667	0.833333	0.783333	0.833333	0.166667	-0.0333333	0.616667	0.133333	0.383333	0.45	0.466667	0.9	0.533333	0.9	0.9	0.666667	0.916667	0.8	0.5	0.783333	0.516667	0.75	0.85	0.466667	0.783333	0.866667	0.733333	0.85	0.833333	0.866667	0.5	0.466667	0.883333	0.866667	0.55	0.966667	0.883333	0.9	0.9	0.933333	0.866667	1
EIL	0.266667	0.583333	-0.6	0.1	0.733333	0.3	-0.116667	-0.633333	0.566667	0.833333	0.566667	-0.1	0.333333	0.666667	0.4	0.283333	0.616667	0.116667	0.683333	0.566667	0.783333	0.783333	0.45	0.733333	0.666667	0.383333	0.8	0.15	0.8	0.883333	0.366667	0.55	0.583333	0.333333	0.6	0.65	0.65	0.316667	0.216667	0.533333	0.7	0.266667	0.783333	0.633333	0.783333	0.683333	0.733333	0.666667	0.8
FAR	0.416667	0.75	-0.633333	0.0333333	0.75	0.416667	-0.116667	-0.766667	0.8	0.816667	0.75	0.116667	0.0833333	0.716667	0.133333	0.3	0.633333	0.3	0.8	0.5	0.95	0.9	0.666667	0.816667	0.766667	0.466667	0.8	0.45	0.85	0.833333	0.416667	0.7	0.733333	0.633333	0.816667	0.833333	0.783333	0.483333	0.45	0.716667	0.883333	0.566667	0.883333	0.85	0.9	0.85	0.933333	0.75	0.866667
FHA-SMAD	0.5	0.633333	-0.566667	-0.15	0.916667	0.283333	0.133333	-0.733333	0.75	0.716667	0.716667	0.4	-0.133333	0.666667	0.0333333	0.316667	0.383333	0.35	0.75	0.55	0.866667	0.866667	0.6	0.783333	0.716667	0.5	0.666667	0.683333	0.7	0.75	0.333333	0.65	0.816667	0.833333	0.883333	0.85	0.733333	0.35	0.383333	0.85	0.85	0.566667	0.983333	0.933333	0.866667	0.933333	0.9	0.833333	0.933333
GAGA-Binding-like	0.783333	0.8	0.133333	-0.383333	0.0666667	0.616667	0.0166667	-0.133333	0.566667	0.6	0.766667	0.4	-0.533333	0.233333	-0.4	0.666667	-0.15	0.466667	0.633333	-0.266667	0.466667	0.533333	0.683333	0.45	0.583333	0.85	0.633333	0.516667	0.65	0.666667	0.816667	0.633333	0.6	0.6	0.583333	0.666667	0.6	0.25	0.783333	0.516667	0.7	0.266667	0.45	0.483333	0.533333	0.433333	0.533333	0.65	0.433333
GeBP	0.5	0.55	-0.0166667	-0.616667	0.466667	0.283333	-0.266667	-0.55	0.75	0.716667	0.716667	0.616667	-0.35	0.633333	-0.05	0.383333	-0.0666667	0.216667	0.6	0.2	0.55	0.816667	0.433333	0.783333	0.483333	0.5	0.716667	0.616667	0.733333	0.566667	0.5	0.466667	0.566667	0.65	0.55	0.533333	0.516667	0	0.333333	0.583333	0.666667	0.616667	0.666667	0.583333	0.816667	0.816667	0.733333	0.7	0.7
GRAS	0.816667	0.366667	0.3	0.116667	-0.15	0.733333	0.483333	0.45	0.15	0.0833333	0.5	-0.0333333	-0.866667	-0.283333	-0.8	0.55	-0.5	0.866667	0.483333	-0.583333	0.133333	-0.0166667	0.666667	0.166667	0.566667	0.6	0.0666667	0.5	0.0666667	0.216667	0.733333	0.6	0.616667	0.516667	0.366667	0.416667	0.533333	0.35	0.783333	0.566667	0.4	-0.166667	0.183333	0.266667	-0.0166667	0	0.183333	0.55	0.216667
Hap2/NF-YA	-0.766667	-0.666667	0.133333	-0.05	-0.466667	-0.75	-0.183333	0.25	-0.666667	-0.566667	-0.616667	-0.1	0.433333	-0.466667	0.25	-0.683333	-0.05	-0.733333	-0.75	-0.316667	-0.8	-0.55	-0.883333	-0.683333	-0.85	-0.65	-0.566667	-0.783333	-0.55	-0.466667	-0.6	-0.866667	-0.783333	-0.716667	-0.75	-0.716667	-0.833333	-0.45	-0.616667	-0.816667	-0.633333	-0.266667	-0.683333	-0.766667	-0.55	-0.6	-0.666667	-0.633333	-0.7
Hap3/NF-YB	0.466667	0.783333	-0.5	-0.216667	0.716667	0.416667	-0.0166667	-0.783333	0.966667	0.683333	0.866667	0.4	-0.0833333	0.616667	0.0666667	0.283333	0.466667	0.4	0.833333	0.483333	0.883333	0.933333	0.633333	0.883333	0.65	0.433333	0.733333	0.583333	0.716667	0.7	0.366667	0.716667	0.766667	0.8	0.85	0.8	0.783333	0.516667	0.5	0.816667	0.85	0.833333	0.883333	0.883333	0.933333	0.95	0.966667	0.733333	0.9
HD-ZIP	0.783333	0.866667	-0.366667	0.166667	0.533333	0.833333	0.3	-0.333333	0.783333	0.666667	0.9	-0.0333333	-0.283333	0.35	-0.183333	0.6	0.3	0.8	0.983333	0.216667	0.866667	0.7	0.916667	0.8	0.933333	0.683333	0.7	0.55	0.65	0.8	0.716667	0.983333	0.95	0.75	0.866667	0.883333	1	0.716667	0.8	0.933333	0.866667	0.366667	0.816667	0.833333	0.7	0.666667	0.833333	0.85	0.866667
HMG	0.483333	0.783333	-0.616667	-0.1	0.833333	0.4	0.0166667	-0.8	0.883333	0.783333	0.833333	0.3	-0.0166667	0.683333	0.1	0.316667	0.55	0.366667	0.85	0.533333	0.95	0.95	0.666667	0.866667	0.75	0.5	0.783333	0.566667	0.8	0.833333	0.4	0.733333	0.816667	0.783333	0.9	0.883333	0.816667	0.5	0.483333	0.833333	0.916667	0.683333	0.966667	0.933333	0.95	0.95	0.983333	0.816667	0.95
Homeodomain-LIKE	0.783333	0.933333	0	-0.266667	0.283333	0.766667	0.05	-0.25	0.733333	0.783333	0.8	0.2	-0.216667	0.416667	0	0.833333	0.0666667	0.516667	0.816667	0.183333	0.7	0.683333	0.766667	0.7	0.733333	0.866667	0.866667	0.45	0.766667	0.816667	0.816667	0.833333	0.683333	0.533333	0.666667	0.716667	0.8	0.383333	0.7	0.633333	0.683333	0.266667	0.616667	0.6	0.683333	0.566667	0.633333	0.65	0.666667
Homobox-WOX	0.433333	0.516667	-0.0333333	-0.583333	0.5	0.283333	-0.4	-0.616667	0.783333	0.766667	0.65	0.55	-0.25	0.766667	0.0666667	0.383333	0	0.166667	0.583333	0.35	0.616667	0.85	0.433333	0.85	0.5	0.433333	0.766667	0.616667	0.783333	0.516667	0.45	0.466667	0.516667	0.583333	0.516667	0.483333	0.516667	-0.0333333	0.233333	0.55	0.616667	0.633333	0.666667	0.583333	0.85	0.85	0.75	0.633333	0.716667
HSF-type-DNA-binding	0.933333	0.816667	-0.15	0.0833333	0.383333	0.85	0.483333	-0.1	0.633333	0.5	0.816667	0.116667	-0.583333	0.166667	-0.466667	0.716667	0	0.9	0.866667	0	0.716667	0.5	0.95	0.583333	0.883333	0.816667	0.516667	0.716667	0.483333	0.65	0.766667	0.95	0.933333	0.833333	0.85	0.866667	0.916667	0.633333	0.9	0.916667	0.783333	0.216667	0.7	0.783333	0.5	0.516667	0.666667	0.8	0.7
JmjC	0.633333	0.366667	0.133333	0	-0.0166667	0.35	0.566667	0.35	-0.116667	0.116667	0.233333	0.133333	-0.5	-0.25	-0.5	0.55	-0.316667	0.4	0.216667	-0.383333	0.0666667	-0.0833333	0.416667	-0.183333	0.35	0.716667	0.0666667	0.316667	0.0833333	0.383333	0.516667	0.333333	0.383333	0.35	0.35	0.45	0.266667	0.133333	0.566667	0.283333	0.3	-0.4	0.166667	0.216667	-0.0833333	-0.1	-0.0166667	0.366667	0.05
JmjC-ARID	0.916667	0.783333	-0.183333	0.0333333	0.433333	0.766667	0.516667	-0.133333	0.616667	0.483333	0.833333	0.2	-0.616667	0.15	-0.5	0.65	-0.0166667	0.866667	0.85	-0.0333333	0.683333	0.516667	0.9	0.566667	0.85	0.8	0.483333	0.733333	0.466667	0.666667	0.733333	0.9	0.95	0.883333	0.866667	0.883333	0.883333	0.6	0.883333	0.933333	0.816667	0.25	0.733333	0.8	0.516667	0.55	0.683333	0.85	0.716667
Lambda-DB	-0.383333	0.233333	-0.65	-0.216667	0.566667	-0.4	-0.333333	-0.866667	0.433333	0.35	0.2	0.3	0.666667	0.516667	0.633333	-0.35	0.766667	-0.5	0.133333	0.633333	0.4	0.6	-0.183333	0.333333	-0.0833333	-0.183333	0.383333	-0.133333	0.4	0.383333	-0.35	-0.0833333	0	0.1	0.266667	0.233333	0.0333333	0.0833333	-0.25	0.0333333	0.3	0.65	0.416667	0.333333	0.6	0.566667	0.466667	0.0833333	0.366667
LIM	0.466667	0.65	-0.216667	-0.45	0.666667	0.35	0	-0.633333	0.866667	0.65	0.7	0.516667	-0.1	0.616667	0.216667	0.433333	0.166667	0.316667	0.7	0.6	0.716667	0.833333	0.483333	0.85	0.516667	0.45	0.716667	0.6	0.616667	0.566667	0.333333	0.616667	0.633333	0.683333	0.683333	0.6	0.65	0.25	0.3	0.716667	0.6	0.683333	0.783333	0.733333	0.833333	0.883333	0.766667	0.6	0.833333
LisH	0.0666667	0.5	-0.866667	0.116667	0.933333	0.05	0.116667	-0.85	0.65	0.533333	0.516667	0.116667	0.416667	0.566667	0.433333	-0.0333333	0.816667	0.0833333	0.6	0.783333	0.8	0.766667	0.316667	0.65	0.466667	0.116667	0.533333	0.233333	0.516667	0.666667	-0.05	0.45	0.566667	0.516667	0.716667	0.666667	0.566667	0.483333	0.116667	0.616667	0.65	0.6	0.85	0.783333	0.766667	0.8	0.783333	0.533333	0.816667
MADS-MIKC	0.55	0.783333	-0.616667	-0.0833333	0.833333	0.4	0.216667	-0.733333	0.85	0.65	0.833333	0.383333	-0.15	0.55	-0.05	0.316667	0.483333	0.466667	0.833333	0.466667	0.916667	0.866667	0.7	0.766667	0.733333	0.533333	0.65	0.666667	0.666667	0.766667	0.366667	0.75	0.866667	0.9	0.966667	0.933333	0.816667	0.566667	0.566667	0.9	0.916667	0.683333	0.966667	0.983333	0.866667	0.916667	0.95	0.816667	0.916667
MADS-type1	0.75	0.716667	-0.15	-0.366667	0.45	0.433333	0.233333	-0.366667	0.65	0.533333	0.816667	0.6	-0.6	0.3	-0.45	0.466667	-0.05	0.516667	0.683333	-0.0666667	0.583333	0.65	0.666667	0.533333	0.616667	0.733333	0.516667	0.75	0.566667	0.65	0.6	0.633333	0.783333	0.9	0.8	0.816667	0.65	0.316667	0.716667	0.766667	0.833333	0.483333	0.716667	0.75	0.65	0.683333	0.716667	0.816667	0.65
MBF1	-0.316667	0	-0.316667	-0.1	0.183333	-0.25	-0.633333	-0.5	0.183333	0.4	0.183333	-0.0333333	0.366667	0.416667	0.3	-0.366667	0.416667	-0.416667	0.0833333	0.05	0.133333	0.433333	-0.183333	0.316667	0	-0.216667	0.35	-0.283333	0.466667	0.333333	-0.0166667	-0.166667	-0.05	-0.133333	-0.05	0.0166667	-0.0333333	-0.133333	-0.2	-0.116667	0.283333	0.316667	0.166667	0	0.433333	0.3	0.333333	0.216667	0.2
MYB	0.783333	0.766667	-0.0833333	0.0833333	0.333333	0.816667	0.116667	-0.1	0.516667	0.783333	0.666667	-0.15	-0.216667	0.4	-0.0666667	0.816667	0.0833333	0.6	0.8	0.15	0.7	0.55	0.816667	0.65	0.883333	0.816667	0.783333	0.4	0.733333	0.816667	0.85	0.85	0.733333	0.433333	0.616667	0.7	0.833333	0.383333	0.65	0.65	0.666667	-0.05	0.616667	0.566667	0.55	0.433333	0.566667	0.716667	0.666667
MYB-HB-like	0.733333	0.85	-0.4	0.133333	0.583333	0.783333	0.316667	-0.4	0.833333	0.616667	0.883333	0.0333333	-0.25	0.366667	-0.133333	0.55	0.333333	0.783333	0.966667	0.316667	0.883333	0.716667	0.883333	0.816667	0.883333	0.616667	0.666667	0.583333	0.6	0.733333	0.616667	0.966667	0.933333	0.783333	0.883333	0.866667	0.983333	0.733333	0.75	0.95	0.833333	0.466667	0.833333	0.866667	0.716667	0.716667	0.85	0.8	0.883333
NAM	0.816667	0.65	-0.1	0.0333333	0.416667	0.733333	0	-0.183333	0.516667	0.816667	0.7	-0.0166667	-0.466667	0.516667	-0.316667	0.7	-0.0166667	0.616667	0.783333	0.0166667	0.716667	0.616667	0.85	0.7	0.95	0.783333	0.733333	0.616667	0.8	0.766667	0.866667	0.8	0.816667	0.6	0.666667	0.75	0.816667	0.266667	0.65	0.733333	0.8	0.0333333	0.7	0.65	0.616667	0.55	0.683333	0.883333	0.716667
Nin-like	0.9	0.783333	-0.15	0.183333	0.25	0.866667	0.466667	-0.0333333	0.583333	0.4	0.816667	0.0333333	-0.633333	0.05	-0.6	0.616667	0.0166667	0.933333	0.833333	-0.183333	0.65	0.416667	0.95	0.5	0.85	0.75	0.416667	0.65	0.416667	0.583333	0.766667	0.916667	0.9	0.8	0.8	0.833333	0.883333	0.7	0.966667	0.866667	0.783333	0.216667	0.6	0.716667	0.416667	0.416667	0.633333	0.766667	0.6
PAZ-Argonaute	0.733333	0.516667	-0.15	0.216667	0.25	0.666667	0.666667	0.0666667	0.433333	0.1	0.683333	0.05	-0.65	-0.183333	-0.616667	0.366667	-0.0833333	0.916667	0.683333	-0.216667	0.416667	0.233333	0.716667	0.366667	0.633333	0.483333	0.116667	0.566667	0.0833333	0.35	0.516667	0.733333	0.816667	0.766667	0.666667	0.65	0.716667	0.666667	0.8	0.833333	0.6	0.216667	0.5	0.6	0.233333	0.316667	0.483333	0.666667	0.516667
PHD	0.483333	0.783333	-0.616667	-0.1	0.833333	0.4	0.0166667	-0.8	0.883333	0.783333	0.833333	0.3	-0.0166667	0.683333	0.1	0.316667	0.55	0.366667	0.85	0.533333	0.95	0.95	0.666667	0.866667	0.75	0.5	0.783333	0.566667	0.8	0.833333	0.4	0.733333	0.816667	0.783333	0.9	0.883333	0.816667	0.5	0.483333	0.833333	0.916667	0.683333	0.966667	0.933333	0.95	0.95	0.983333	0.816667	0.95
RAV	0.733333	0.683333	-0.0166667	0.116667	0.266667	0.783333	0.133333	0	0.4	0.716667	0.533333	-0.216667	-0.166667	0.35	-0.0166667	0.833333	0.0333333	0.55	0.7	0.166667	0.616667	0.433333	0.75	0.55	0.816667	0.783333	0.716667	0.333333	0.65	0.733333	0.8	0.783333	0.633333	0.316667	0.516667	0.6	0.75	0.316667	0.566667	0.55	0.533333	-0.183333	0.516667	0.466667	0.433333	0.316667	0.433333	0.6	0.566667
RB	0.5	0.716667	-0.25	-0.533333	0.666667	0.283333	0.1	-0.65	0.85	0.616667	0.75	0.666667	-0.15	0.533333	0.133333	0.416667	0.166667	0.283333	0.683333	0.5	0.683333	0.833333	0.466667	0.75	0.466667	0.533333	0.683333	0.616667	0.6	0.633333	0.333333	0.583333	0.65	0.766667	0.75	0.683333	0.616667	0.266667	0.383333	0.716667	0.666667	0.716667	0.8	0.766667	0.833333	0.883333	0.766667	0.633333	0.8
RR-A-type	0.7	0.833333	-0.0666667	-0.0333333	0.166667	0.716667	0.0166667	-0.15	0.516667	0.7	0.65	0	-0.183333	0.333333	-0.116667	0.733333	0.15	0.45	0.683333	0.0166667	0.633333	0.516667	0.75	0.483333	0.716667	0.816667	0.733333	0.333333	0.716667	0.766667	0.783333	0.733333	0.583333	0.4	0.583333	0.683333	0.7	0.383333	0.7	0.483333	0.65	0.0666667	0.483333	0.5	0.516667	0.366667	0.516667	0.566667	0.483333
S1Fa-like	0.15	0.533333	-0.533333	-0.25	0.75	0.1	-0.283333	-0.916667	0.816667	0.616667	0.5	0.433333	0.166667	0.816667	0.3	0.116667	0.566667	0.0333333	0.516667	0.75	0.833333	0.85	0.4	0.733333	0.433333	0.2	0.633333	0.533333	0.666667	0.45	0.0333333	0.433333	0.45	0.583333	0.666667	0.583333	0.5	0.25	0.116667	0.533333	0.6	0.8	0.75	0.766667	0.85	0.9	0.816667	0.416667	0.716667
SAP	0.766667	0.883333	0.1	-0.416667	0.25	0.716667	0.116667	-0.216667	0.766667	0.683333	0.833333	0.333333	-0.283333	0.316667	0	0.783333	-0.0666667	0.533333	0.8	0.15	0.583333	0.666667	0.666667	0.716667	0.616667	0.8	0.8	0.45	0.65	0.733333	0.766667	0.783333	0.666667	0.566667	0.616667	0.633333	0.75	0.35	0.666667	0.65	0.616667	0.366667	0.583333	0.55	0.666667	0.583333	0.6	0.633333	0.666667
SBP	0.566667	0.883333	-0.566667	0.0666667	0.633333	0.566667	0.283333	-0.6	0.85	0.533333	0.8	0.216667	-0.0833333	0.4	-0.05	0.4	0.55	0.566667	0.833333	0.433333	0.916667	0.733333	0.783333	0.666667	0.716667	0.55	0.6	0.566667	0.566667	0.683333	0.383333	0.833333	0.8	0.8	0.933333	0.9	0.85	0.75	0.683333	0.833333	0.816667	0.633333	0.816667	0.916667	0.733333	0.75	0.85	0.633333	0.783333
SET	0.7	0.85	-0.516667	-0.0166667	0.733333	0.55	0.366667	-0.516667	0.75	0.683333	0.883333	0.25	-0.216667	0.4	-0.116667	0.483333	0.366667	0.583333	0.9	0.3	0.85	0.783333	0.766667	0.716667	0.816667	0.7	0.683333	0.583333	0.666667	0.9	0.566667	0.833333	0.933333	0.85	0.95	0.966667	0.883333	0.6	0.7	0.916667	0.933333	0.45	0.933333	0.916667	0.783333	0.783333	0.866667	0.9	0.9
SNF2	0.25	0.666667	-0.766667	-0.0166667	0.833333	0.2	-0.0333333	-0.9	0.816667	0.633333	0.7	0.283333	0.15	0.65	0.166667	0.0666667	0.733333	0.2	0.7	0.583333	0.9	0.883333	0.516667	0.733333	0.583333	0.283333	0.633333	0.45	0.683333	0.7	0.15	0.566667	0.666667	0.7	0.833333	0.8	0.666667	0.516667	0.35	0.7	0.833333	0.766667	0.883333	0.883333	0.883333	0.9	0.933333	0.65	0.833333
ssDNA-binding-TF	0.25	0.383333	0.1	-0.0666667	0.0666667	0.433333	-0.15	0.0166667	0.25	0.6	0.35	-0.316667	0.283333	0.233333	0.466667	0.483333	0.05	0.1	0.45	0.183333	0.216667	0.35	0.183333	0.5	0.35	0.35	0.666667	-0.266667	0.5	0.616667	0.533333	0.366667	0.216667	-0.183333	0.0333333	0.116667	0.383333	0.05	0.116667	0.133333	0.183333	-0.166667	0.216667	0	0.35	0.15	0.183333	0.316667	0.383333
SSXT	0.283333	0.583333	-0.616667	-0.0333333	0.816667	0.233333	-0.166667	-0.75	0.65	0.866667	0.633333	0.0833333	0.233333	0.75	0.333333	0.233333	0.583333	0.1	0.7	0.566667	0.816667	0.883333	0.45	0.8	0.666667	0.383333	0.816667	0.283333	0.85	0.883333	0.35	0.533333	0.633333	0.466667	0.666667	0.7	0.65	0.266667	0.216667	0.6	0.783333	0.416667	0.866667	0.716667	0.883333	0.816667	0.833333	0.75	0.866667
STY-LRP1	0.733333	0.716667	-0.433333	0.0166667	0.716667	0.516667	0.25	-0.433333	0.583333	0.75	0.75	0.2	-0.333333	0.5	-0.233333	0.533333	0.233333	0.533333	0.8	0.216667	0.816667	0.716667	0.783333	0.65	0.883333	0.75	0.666667	0.666667	0.733333	0.866667	0.633333	0.766667	0.9	0.8	0.883333	0.933333	0.816667	0.4	0.633333	0.85	0.916667	0.233333	0.9	0.866667	0.716667	0.716667	0.8	0.933333	0.833333
SWIB-Plus-3	0.416667	0.35	-0.1	-0.0333333	0.0166667	0.266667	0.533333	0	0.316667	-0.216667	0.516667	0.366667	-0.6	-0.366667	-0.666667	0	-0.0833333	0.566667	0.333333	-0.416667	0.116667	0.0833333	0.366667	0.0333333	0.166667	0.233333	-0.166667	0.416667	-0.15	0.0666667	0.183333	0.333333	0.466667	0.666667	0.466667	0.433333	0.316667	0.516667	0.65	0.5	0.416667	0.433333	0.216667	0.383333	0.0833333	0.183333	0.3	0.35	0.166667
TAZ	0.816667	0.6	-0.05	0.35	0.1	0.883333	0.583333	0.2	0.416667	0.183333	0.666667	-0.183333	-0.616667	-0.166667	-0.6	0.55	-0.0833333	1	0.733333	-0.25	0.466667	0.183333	0.85	0.383333	0.75	0.583333	0.216667	0.5	0.166667	0.383333	0.683333	0.85	0.8	0.633333	0.616667	0.633333	0.8	0.716667	0.883333	0.783333	0.566667	0.05	0.416667	0.533333	0.183333	0.2	0.433333	0.616667	0.466667
TCP	0.566667	0.75	-0.6	-0.0333333	0.816667	0.416667	0.0833333	-0.7	0.766667	0.783333	0.816667	0.266667	-0.15	0.633333	-0.0666667	0.35	0.466667	0.416667	0.833333	0.383333	0.916667	0.883333	0.716667	0.783333	0.816667	0.583333	0.733333	0.616667	0.8	0.866667	0.483333	0.733333	0.866667	0.816667	0.916667	0.933333	0.816667	0.466667	0.55	0.85	0.966667	0.533333	0.966667	0.933333	0.883333	0.883333	0.95	0.9	0.916667
Tesmin	0.6	0.883333	-0.216667	-0.4	0.516667	0.516667	0.0166667	-0.533333	0.85	0.8	0.883333	0.383333	-0.0666667	0.5	0.166667	0.566667	0.233333	0.35	0.833333	0.333333	0.716667	0.866667	0.583333	0.816667	0.616667	0.683333	0.883333	0.4	0.783333	0.883333	0.616667	0.716667	0.7	0.616667	0.716667	0.733333	0.75	0.366667	0.55	0.683333	0.766667	0.55	0.766667	0.683333	0.866667	0.783333	0.783333	0.733333	0.816667
TIFY	0.95	0.8	-0.05	0.05	0.266667	0.866667	0.333333	-0.0666667	0.6	0.516667	0.766667	0.133333	-0.666667	0.216667	-0.566667	0.75	-0.0666667	0.866667	0.8	-0.1	0.7	0.466667	0.983333	0.533333	0.883333	0.85	0.516667	0.766667	0.533333	0.583333	0.816667	0.916667	0.866667	0.8	0.8	0.833333	0.866667	0.55	0.916667	0.833333	0.766667	0.183333	0.616667	0.733333	0.466667	0.466667	0.633333	0.75	0.6
TUBBY	0.483333	0.683333	-0.45	-0.133333	0.75	0.466667	-0.0333333	-0.683333	0.883333	0.766667	0.833333	0.216667	-0.0666667	0.65	0.133333	0.333333	0.383333	0.433333	0.866667	0.5	0.85	0.916667	0.616667	0.966667	0.733333	0.416667	0.783333	0.516667	0.75	0.75	0.45	0.733333	0.8	0.7	0.766667	0.733333	0.816667	0.433333	0.416667	0.833333	0.816667	0.65	0.9	0.816667	0.916667	0.916667	0.933333	0.816667	0.966667
WD40-like	0.483333	0.783333	-0.616667	-0.1	0.833333	0.4	0.0166667	-0.8	0.883333	0.783333	0.833333	0.3	-0.0166667	0.683333	0.1	0.316667	0.55	0.366667	0.85	0.533333	0.95	0.95	0.666667	0.866667	0.75	0.5	0.783333	0.566667	0.8	0.833333	0.4	0.733333	0.816667	0.783333	0.9	0.883333	0.816667	0.5	0.483333	0.833333	0.916667	0.683333	0.966667	0.933333	0.95	0.95	0.983333	0.816667	0.95
WRKY	0.85	0.883333	-0.233333	0.133333	0.416667	0.9	0.333333	-0.216667	0.75	0.616667	0.866667	-0.0166667	-0.366667	0.283333	-0.25	0.7	0.183333	0.85	0.95	0.15	0.816667	0.616667	0.95	0.733333	0.916667	0.75	0.666667	0.583333	0.6	0.733333	0.766667	1	0.916667	0.733333	0.833333	0.85	0.983333	0.7	0.85	0.9	0.8	0.3	0.733333	0.783333	0.616667	0.583333	0.75	0.783333	0.783333
Znf-B	0.65	0.75	-0.516667	0.133333	0.683333	0.6	0.0666667	-0.566667	0.75	0.733333	0.783333	0.1	-0.266667	0.6	-0.216667	0.433333	0.416667	0.583333	0.85	0.3	0.95	0.783333	0.866667	0.766667	0.916667	0.6	0.683333	0.683333	0.766667	0.75	0.566667	0.833333	0.883333	0.8	0.9	0.916667	0.883333	0.55	0.65	0.866667	0.933333	0.45	0.883333	0.916667	0.783333	0.783333	0.916667	0.85	0.85
Znf-LSD	0.75	0.75	-0.45	0.15	0.616667	0.666667	0.233333	-0.416667	0.7	0.666667	0.866667	0.0833333	-0.416667	0.416667	-0.366667	0.45	0.283333	0.716667	0.9	0.1	0.85	0.716667	0.883333	0.733333	0.933333	0.65	0.616667	0.666667	0.683333	0.783333	0.666667	0.866667	0.966667	0.85	0.9	0.933333	0.916667	0.6	0.766667	0.933333	0.966667	0.383333	0.866667	0.883333	0.716667	0.716667	0.883333	0.95	0.85
[truncated: 48 more columns]

## Sheet: Table S6
GeneID	OPTs	rho
PG_YSL_15	PG_YSL_2	0.85
PG_YSL_2	PG_YSL_2	1
PG_OPT_10	PG_YSL_2	0.866667
PG_OPT_6	PG_YSL_2	0.85
PLATZ	PG_YSL_2	0.9
ABTB	PG_YSL_2	0.883333
CHROMO-DOMAIN	PG_YSL_2	0.9
CW-Zn	PG_YSL_2	0.883333
CW-Zn-B3/VAL	PG_YSL_2	0.9
Hap3/NF-YB	PG_YSL_2	0.966667
HMG	PG_YSL_2	0.883333
LIM	PG_YSL_2	0.866667
MADS-MIKC	PG_YSL_2	0.85
PHD	PG_YSL_2	0.883333
RB	PG_YSL_2	0.85
SBP	PG_YSL_2	0.85
Tesmin	PG_YSL_2	0.85
TUBBY	PG_YSL_2	0.883333
WD40-like	PG_YSL_2	0.883333
PG_YSL_3	PG_YSL_3	1
ARID	PG_YSL_3	0.9
GRAS	PG_YSL_3	-0.866667
GRF	PG_YSL_5	0.85
PG_YSL_5	PG_YSL_5	1
PG_YSL_16	PG_YSL_5	0.883333
A20-like	PG_YSL_5	0.883333
BES/BZR	PG_YSL_5	0.866667
bHLH	PG_YSL_5	0.9
C2C2-GATA	PG_YSL_5	0.85
HSF-type-DNA-binding	PG_YSL_5	0.85
Nin-like	PG_YSL_5	0.866667
TAZ	PG_YSL_5	0.883333
TIFY	PG_YSL_5	0.866667
WRKY	PG_YSL_5	0.9
PG_YSL_7	PG_YSL_7	1
PG_OPT_11	PG_YSL_7	-0.85
PG_YSL_11	PG_YSL_8	-0.916667
PG_YSL_8	PG_YSL_8	1
PG_YSL_11	PG_YSL_11	1
PG_YSL_8	PG_YSL_11	-0.916667
LisH	PG_YSL_11	-0.866667
GRF	PG_YSL_12	0.866667
PG_YSL_12	PG_YSL_12	1
ARF	PG_YSL_12	0.916667
BES/BZR	PG_YSL_12	0.85
PG_OPT_3	PG_OPT_3	1
PG_OPT_4	PG_OPT_4	1
PLATZ	PG_OPT_4	0.866667
ABTB	PG_OPT_4	0.85
AS2-LOB	PG_OPT_4	0.966667
B3-Domain	PG_OPT_4	0.983333
CHROMO-DOMAIN	PG_OPT_4	0.866667
SSXT	PG_OPT_4	0.866667
PG_YSL_13	PG_YSL_13	1
PG_YSL_15	PG_OPT_5	0.883333
PG_OPT_10	PG_OPT_5	0.95
PG_OPT_5	PG_OPT_5	1
PG_OPT_6	PG_OPT_5	0.85
A20-like	PG_OPT_5	0.85
ABTB	PG_OPT_5	0.85
AP2-EREBP	PG_OPT_5	0.883333
BED-type(Zn)	PG_OPT_5	0.85
bHLH	PG_OPT_5	0.95
Bromodomain	PG_OPT_5	0.933333
BTB-POZ-MATH	PG_OPT_5	0.85
bZIP	PG_OPT_5	0.866667
C2C2-CO-like	PG_OPT_5	0.983333
C2H2	PG_OPT_5	0.916667
C3H	PG_OPT_5	0.883333
CW-Zn-B3/VAL	PG_OPT_5	0.866667
DDT	PG_OPT_5	0.866667
E2F-DP	PG_OPT_5	0.9
HD-ZIP	PG_OPT_5	0.983333
HMG	PG_OPT_5	0.85
HSF-type-DNA-binding	PG_OPT_5	0.866667
JmjC-ARID	PG_OPT_5	0.85
MYB-HB-like	PG_OPT_5	0.966667
PHD	PG_OPT_5	0.85
SET	PG_OPT_5	0.9
TUBBY	PG_OPT_5	0.866667
WD40-like	PG_OPT_5	0.85
WRKY	PG_OPT_5	0.95
Znf-B	PG_OPT_5	0.85
Znf-LSD	PG_OPT_5	0.9
PG_YSL_2	PG_OPT_6	0.85
PG_OPT_5	PG_OPT_6	0.85
PG_OPT_6	PG_OPT_6	1
PLATZ	PG_OPT_6	0.866667
BTB-POZ-MATH	PG_OPT_6	0.9
bZIP	PG_OPT_6	0.883333
C2C2-CO-like	PG_OPT_6	0.866667
C3H	PG_OPT_6	0.866667
CCHC(Zn)	PG_OPT_6	0.916667
CG1-CAMTA	PG_OPT_6	0.933333
CHROMO-DOMAIN	PG_OPT_6	0.866667
CW-Zn	PG_OPT_6	0.866667
CW-Zn-B3/VAL	PG_OPT_6	0.933333
E2F-DP	PG_OPT_6	0.9
FAR	PG_OPT_6	0.95
FHA-SMAD	PG_OPT_6	0.866667
Hap3/NF-YB	PG_OPT_6	0.883333
HD-ZIP	PG_OPT_6	0.866667
HMG	PG_OPT_6	0.95
MADS-MIKC	PG_OPT_6	0.916667
MYB-HB-like	PG_OPT_6	0.883333
PHD	PG_OPT_6	0.95
SBP	PG_OPT_6	0.916667
SET	PG_OPT_6	0.85
SNF2	PG_OPT_6	0.9
TCP	PG_OPT_6	0.916667
TUBBY	PG_OPT_6	0.85
WD40-like	PG_OPT_6	0.95
Znf-B	PG_OPT_6	0.95
Znf-LSD	PG_OPT_6	0.85
PG_OPT_7	PG_OPT_7	1
CW-Zn	PG_OPT_7	-0.866667
Lambda-DB	PG_OPT_7	-0.866667
LisH	PG_OPT_7	-0.85
S1Fa-like	PG_OPT_7	-0.916667
SNF2	PG_OPT_7	-0.9
PG_OPT_8	PG_OPT_8	1
B3-Domain	PG_OPT_8	0.85
PG_YSL_15	PG_YSL_15	1
PG_YSL_2	PG_YSL_15	0.85
PG_OPT_10	PG_YSL_15	0.9
PG_OPT_5	PG_YSL_15	0.883333
bHLH	PG_YSL_15	0.883333
bZIP	PG_YSL_15	0.85
C2C2-CO-like	PG_YSL_15	0.866667
HD-ZIP	PG_YSL_15	0.866667
Homeodomain-LIKE	PG_YSL_15	0.933333
MYB-HB-like	PG_YSL_15	0.85
SAP	PG_YSL_15	0.883333
SBP	PG_YSL_15	0.883333
SET	PG_YSL_15	0.85
Tesmin	PG_YSL_15	0.883333
WRKY	PG_YSL_15	0.883333
PG_YSL_5	PG_YSL_16	0.883333
PG_YSL_16	PG_YSL_16	1
A20-like	PG_YSL_16	0.85
bHLH	PG_YSL_16	0.85
C2C2-GATA	PG_YSL_16	0.883333
GRAS	PG_YSL_16	0.866667
HSF-type-DNA-binding	PG_YSL_16	0.9
JmjC-ARID	PG_YSL_16	0.866667
Nin-like	PG_YSL_16	0.933333
PAZ-Argonaute	PG_YSL_16	0.916667
TAZ	PG_YSL_16	1
TIFY	PG_YSL_16	0.866667
WRKY	PG_YSL_16	0.85
PG_YSL_15	PG_OPT_10	0.9
PG_YSL_2	PG_OPT_10	0.866667
PG_OPT_10	PG_OPT_10	1
PG_OPT_5	PG_OPT_10	0.95
bHLH	PG_OPT_10	0.866667
Bromodomain	PG_OPT_10	0.883333
bZIP	PG_OPT_10	0.85
C2C2-CO-like	PG_OPT_10	0.9
C2H2	PG_OPT_10	0.866667
C3H	PG_OPT_10	0.9
CW-Zn-B3/VAL	PG_OPT_10	0.866667
DDT	PG_OPT_10	0.85
Hap3/NF-YB	PG_OPT_10	0.866667
HD-ZIP	PG_OPT_10	0.9
MYB-HB-like	PG_OPT_10	0.883333
SET	PG_OPT_10	0.883333
Tesmin	PG_OPT_10	0.883333
WRKY	PG_OPT_10	0.866667
Znf-LSD	PG_OPT_10	0.866667
PG_YSL_7	PG_OPT_11	-0.85
PG_OPT_11	PG_OPT_11	1

## Sheet: Table S7
OPT genes	No. of Correlated TFs
PG_OPT_8	1
PG_YSL_11	1
PG_YSL_3	2
PG_YSL_12	3
PG_OPT_7	5
PG_OPT_4	6
PG_YSL_16	10
PG_YSL_5	10
PG_YSL_15	11
PG_OPT_10	15
PG_YSL_2	15
PG_OPT_5	26
PG_OPT_6	27

## Sheet: Table S8
Transcription Factor	No. of OPT genes
AP2-EREBP	1
ARF	1
ARID	1
AS2-LOB	1
BED-type(Zn)	1
CCHC(Zn)	1
CG1-CAMTA	1
FAR	1
FHA-SMAD	1
Homeodomain-LIKE	1
Lambda-DB	1
LIM	1
PAZ-Argonaute	1
RB	1
S1Fa-like	1
SAP	1
SSXT	1
TAZ	1
TCP	1
B3-Domain	2
BES/BZR	2
Bromodomain	2
BTB-POZ-MATH	2
C2C2-GATA	2
C2H2	2
DDT	2
E2F-DP	2
GRAS	2
GRF	2
JmjC-ARID	2
LisH	2
MADS-MIKC	2
Nin-like	2
SNF2	2
TIFY	2
Znf-B	2
A20-like	3
ABTB	3
C3H	3
CHROMO-DOMAIN	3
CW-Zn	3
Hap3/NF-YB	3
HMG	3
HSF-type-DNA-binding	3
PHD	3
PLATZ	3
SBP	3
Tesmin	3
TUBBY	3
WD40-like	3
Znf-LSD	3
bZIP	4
C2C2-CO-like	4
CW-Zn-B3/VAL	4
HD-ZIP	4
MYB-HB-like	4
SET	4
bHLH	5
WRKY	5
